# Supplementary material
Source: ML conference proceedings conference paper supplement (https://proceedings.neurips.cc/paper_files/paper/2022/hash/3915a87ddac8e8c2f23dbabbcee6eec9-Abstract.html)
Supplement: Supplementary file 1 [file 3915a87ddac8e8c2f23dbabbcee6eec9-Supplemental-Conference.pdf]

## A Overview

In this appendix we

- Introduce some notation in section [B](#) that we will use throughout the appendix.
- Give rigorous definitions of calibration errors omitted in the main paper in Section [C](#)
- Provide proofs for all claims that we make in the main text in Section [D](#).
- Provide details for specific recalibration transformation that illustrate the shortcomings of existing approaches (Section [E](#)).
- Give a detailed overview of proper U-scores that can be used to further generalize our proposed framework of proper calibration errors (Section [F](#)).
- Give more experimental details and report results from additional experiments (Section [G](#)).

## B Notation

The following is implied throughout the appendix. We will use

- The underlying probability space  $(\Omega, \mathcal{F}, \mathbb{P})$ ,  $\mathcal{X}$  the feature space, and  $\mathcal{Y}$  the target space.
- Random variables  $X: \Omega \rightarrow \mathcal{X}$  and  $Y: \Omega \rightarrow \mathcal{Y}$ .
- $\mathbb{P}_{Y|X=x}(y) := \frac{\mathbb{P}(\{\omega \in \Omega | X(\omega)=x \wedge Y(\omega)=y\})}{\mathbb{P}(\{\omega \in \Omega | X(\omega)=x\})}$  and  $\mathbb{P}_Y(y) := \mathbb{P}(\{\omega \in \Omega | Y(\omega)=y\})$  for  $x \in \mathcal{X}$  and  $y \in \mathcal{Y}$ .
- $\mathbb{P}_Y, \mathbb{P}_{Y|X=x} \in \mathcal{P}_n$  with  $\mathcal{P}_n = \{p \in [0, 1]^n | \sum_k p_k = 1\}$ , and  $\mathcal{Y} = \{1, \dots, n\}$  for categorical  $Y$  with  $n \in \mathbb{N}$  classes.
- The index ‘ $-k$ ’ on a finite vector to denote the removal of index  $k$ .
- The random variable  $C: \Omega \rightarrow \mathcal{Y}$  defined as  $C := \arg \max_k f_k(X)$  for  $f: \mathcal{X} \rightarrow \mathcal{P}_n$ . It can be regarded as the top-label prediction of  $f$ .

The notation regarding the (conditional) probability measures will be used for arbitrary random variables.

## C Definitions

A systematic overview of the multitude of calibration errors proposed in the recent literature requires a common notation that can be used to harmonize definitions. For the sake of clarity, we use formulations close to the notation introduced in Kumar et al. [\[31\]](#) and adjust the other errors accordingly, while retaining the notation of the original work whenever possible.

We follow Kumar et al. [\[31\]](#) and define top-label and class-wise calibration errors in expectation:

**Definition C.1.** The **top-label calibration error** of model  $f: \mathcal{X} \rightarrow \mathcal{P}_n$  is defined as

$$\text{TCE}_p(f) = (\mathbb{E}[|f_C(X) - \mathbb{P}(Y = C | f_C(X))|^p])^{\frac{1}{p}}$$

with  $C := \arg \max_k f_k(X)$  and the **class-wise calibration error** is defined as

$$\text{CWCE}_p(f) = \left( \sum_{k \in \mathcal{Y}} \mathbb{E}[|f_k(X) - \mathbb{P}(Y = k | f_k(X))|^p] \right)^{\frac{1}{p}}$$

for  $1 \leq p \in \mathbb{R}$ .

Note that we removed the weighting factors from the original definition in Kumar et al. [\[31\]](#) for easier comparison with the other errors and a fixed upper limit (we will show that  $\text{CWCE}_p \leq 2^{\frac{1}{p}}$ ).

**Definition C.2.** The **Kolmogorov-Smirnov calibration error** [\[16\]](#) of model  $f: \mathcal{X} \rightarrow \mathcal{P}_n$  is given by

$$\text{KS}(f) = \mathbb{E}[\text{KS}(f, C)],$$

where  $C = \arg \max_k f_k(X)$  and  $\text{KS}(f, k) = \max_{\sigma \in [0, 1]} \left| \int_{[0, \sigma]} z - \mathbb{P}(Y = k | f_k(X) = z) d\mathbb{P}_{f_k(X)}(z) \right|$ .

**Definition C.3.** Given a reproducing kernel Hilbert space  $\mathcal{H}$  with kernel  $k: [0, 1] \times [0, 1] \rightarrow \mathbb{R}$  the **maximum mean calibration error** [30] of model  $f: \mathcal{X} \rightarrow \mathcal{P}_n$  is

$$\text{MMCE}(f) = \|\mathbb{E}[(f_C(X) - \mathbb{P}(Y = C | f_C(X)))k(f_C(X), \cdot)]\|_{\mathcal{H}}.$$

**Definition C.4.** Given a reproducing kernel Hilbert space  $\mathcal{H}$  with kernel  $k: \mathcal{P}_n \times \mathcal{P}_n \rightarrow \mathbb{R}^n \times \mathbb{R}^n$  the **kernel calibration error** [57] of model  $f: \mathcal{X} \rightarrow \mathcal{P}_n$  is

$$\text{KCE}(f) = \|\mathbb{E}[(f(X) - \mathbb{P}_{Y|f(X)})k(f(X), \cdot)]\|_{\mathcal{H}}.$$

We also need the following score related definitions in the proofs. These are simply a repetition from the main paper.

**Definition C.5.** Given a proper score  $S$  and  $P, Q \in \mathcal{P}$ , the expected score  $s_S: \mathcal{P} \times \mathcal{P} \rightarrow \mathbb{R}$  is defined as  $s_S(P, Q) = \mathbb{E}_{Y \sim Q}[S(P, Y)] = \int_{\mathcal{Y}} S(P, y) dQ(y)$ .

**Definition C.6.** Given a proper score  $S$  and  $P, Q \in \mathcal{P}$ , the associated **divergence**  $d_S: \mathcal{P} \times \mathcal{P} \rightarrow \mathbb{R}_{\geq 0}$  is defined as  $d_S(P, Q) = s_S(P, Q) - s_S(Q, Q)$  and the associated **generalized entropy**  $g_S: \mathcal{P} \rightarrow \mathbb{R}$  as  $g_S(Q) = s_S(Q, Q)$ .

## D Proofs

### D.1 Helpers

The following will be of use in several proofs.

**Lemma D.1.** Assume that  $S$  is a proper score for which  $CE_S$  exists, then we have

$$CE_S(f) = \mathbb{E}[S(f(X), Y)] - \mathbb{E}[g_S(\mathbb{P}_{Y|f(X)})].$$

*Proof.*

$$\begin{aligned} CE_S(f) &\stackrel{\text{def [4.2]}}{=} \mathbb{E}[d_S(f(X), \mathbb{P}_{Y|f(X)})] \\ &\stackrel{\text{def [C.6]}}{=} \mathbb{E}[s_S(f(X), \mathbb{P}_{Y|f(X)}) - s_S(\mathbb{P}_{Y|f(X)}, \mathbb{P}_{Y|f(X)})] \\ &\stackrel{\text{def [C.6]}}{=} \mathbb{E}[s_S(f(X), \mathbb{P}_{Y|f(X)})] - \mathbb{E}[g_S(\mathbb{P}_{Y|f(X)})] \\ &= \int s_S(z, \mathbb{P}_{Y|f(X)=z}) d\mathbb{P}_{f(X)}(z) - \mathbb{E}[g_S(\mathbb{P}_{Y|f(X)})] \\ &\stackrel{\text{def [C.5]}}{=} \int \int S(z, y) d\mathbb{P}_{Y|f(X)=z}(y) d\mathbb{P}_{f(X)}(z) - \mathbb{E}[g_S(\mathbb{P}_{Y|f(X)})] \\ &= \int S(z, y) d\mathbb{P}_{Y, f(X)}(y, z) - \mathbb{E}[g_S(\mathbb{P}_{Y|f(X)})] \\ &= \mathbb{E}[S(f(X), Y)] - \mathbb{E}[g_S(\mathbb{P}_{Y|f(X)})] \end{aligned} \tag{4}$$

□

## D.2 Theorem 3.1

Given a model  $f : \mathcal{X} \rightarrow \mathcal{P}_n$  and the above defined errors, we have

$$\begin{aligned}
& \text{BS}(f) = 0 \\
& \implies \text{CE}_p(f) = 0 \\
& \iff \text{KCE}(f) = 0 \\
& \iff f \text{ is calibrated} \\
& \implies \text{CWCE}_p(f) = 0 \\
& \implies \text{TCE}_p(f) = 0 \\
& \iff \text{MMCE}(f) = 0 \\
& \iff \text{KS}(f) = 0 \\
& \implies \text{ECE}(f) = 0
\end{aligned} \tag{5}$$

and

$$\begin{aligned}
n^{\frac{1}{p}-\frac{1}{2}}\sqrt{2} & \geq n^{\frac{1}{p}-\frac{1}{2}}\sqrt{\text{BS}(f)} \\
& \geq^* \text{CE}_p(f) \\
& \geq \text{CWCE}_p(f) \\
& \geq \text{TCE}_p(f) \\
& \geq \text{TCE}_1(f) \\
& \geq \begin{cases} \text{KS}(f) \\ \text{ECE}(f) \\ c \cdot \text{MMCE}(f) \end{cases} \geq 0
\end{aligned} \tag{6}$$

for  $1 \leq p \in \mathbb{R}$ . \* BS is only included for  $p \leq 2$ . We define  $c = \sqrt{\max_r k(r, r)}$  as given in Theorem 3 of Kumar et al. [30].

*Proof.* **Regarding**  $\text{BS}(f) = 0 \implies \text{CE}_p(f) = 0 \iff \text{KCE}(f) = 0 \iff f \text{ is calibrated}$ :

$$\begin{aligned}
\text{BS}(f) = 0 & \iff \mathbb{P}_{Y|X} \stackrel{\text{a.s.}}{=} f(X) \\
& \implies \mathbb{P}_{Y|f(X)} \stackrel{\text{a.s.}}{=} f(X) \\
& \iff \begin{cases} \text{CE}_p(f) = 0 \\ \text{KCE}(f) = 0 \\ f \text{ is calibrated} \end{cases}
\end{aligned} \tag{7}$$

The last equivalence follows from Definition 2.1 and 2, and according to Widmann et al. [57]. Since the equivalence in the last line holds for each, it follows  $\text{CE}_p(f) = 0 \iff \text{KCE}(f) = 0 \iff f \text{ is calibrated}$ . Example sketch for  $\text{BS}(f) = 0 \not\iff \text{CE}_p(f) = 0$ : Set  $f(\cdot) = \mathbb{P}_Y$ , then  $f(X) = \mathbb{P}_Y = \mathbb{P}_{Y|\mathbb{P}_Y} = \mathbb{P}_{Y|f(X)}$ , but  $\text{BS}(f) > 0$ .

**Regarding**  $\text{CE}_p(f) = 0 \implies \text{CWCE}_p(f) = 0$ :

$$\begin{aligned}
\text{CE}_p(f) = 0 & \iff \mathbb{P}_{Y|f(X)} \stackrel{\text{a.s.}}{=} f(X) \\
& \iff \mathbb{P}(Y = k | f(X)) \stackrel{\text{a.s.}}{=} f_k(X) \quad \forall k \\
& \implies \mathbb{E}_{f_{-k}(X)}[\mathbb{P}(Y = k | f(X)) | f_k(X)] \stackrel{\text{a.s.}}{=} \mathbb{E}_{f_{-k}}[f_k(X) | f_k(X)] \quad \forall k \\
& \iff \mathbb{P}(Y = k | f_k(X)) | f_k(X) \stackrel{\text{a.s.}}{=} f_k(X) \quad \forall k \\
& \iff \sum_{k \in \mathcal{Y}} \mathbb{E}[(\mathbb{P}(Y = k | f_k(X)) - f_k(X))^p] = 0 \\
& \iff \text{CWCE}_p(f) = 0
\end{aligned} \tag{8}$$

An example for  $\text{CE}_p(f) = 0 \not\Leftarrow \text{CWCE}_p(f) = 0$  is given in the proof of Proposition 3.2 located in Appendix D.3

**Regarding**  $\text{CWCE}_p(f) = 0 \implies \text{TCE}_p(f) = 0 \iff \text{MMCE}(f) = 0$ :

$$\begin{aligned}
\text{CWCE}_p(f) = 0 &\iff \mathbb{P}(Y = k \mid f_k(X)) \stackrel{\text{a.s.}}{=} f_k(X) \quad \forall k \\
&\implies \mathbb{P}(Y = C \mid f_C(X)) \stackrel{\text{a.s.}}{=} f_C(X) \\
&\iff \mathbb{P}\left(Y = \arg \max_k f_k(X) \mid \max_k f_k(X)\right) \stackrel{\text{a.s.}}{=} \max_k f_k(X) \quad (9) \\
&\iff \begin{cases} \text{TCE}_p(f) = 0 \\ \text{MMCE}(f) = 0 \end{cases}
\end{aligned}$$

See Theorem 1 in Kumar et al. [30] regarding MMCE. Note that we could not verify their claim that MMCE is a proper score, which is even contradictive to our findings. A sketch for an example where  $\text{CWCE}_p(f) = 0 \not\Leftarrow \text{TCE}_p(f) = 0$  is if  $\mathbb{P}(Y = C \mid f_C(X)) \stackrel{\text{a.s.}}{=} f_C(X)$  and  $\mathbb{P}(Y = \arg \min_k f_k(X) \mid \min_k f_k(X)) \neq \min_k f_k(X)$ .

**Regarding**  $\text{TCE}_p(f) = 0 \iff \text{KS}(f) = 0$ :

$$\begin{aligned}
\text{TCE}_p(f) = 0 &\iff \mathbb{P}\left(Y = \arg \max_k f_k(X) \mid \max_l f_l(X)\right) \stackrel{\text{a.s.}}{=} \max_m f_m(X) \\
&\iff \mathbb{P}(Y = C \mid f_C(X)) \stackrel{\text{a.s.}}{=} f_C(X) \\
&\stackrel{(i)}{\iff} \int_{\sigma'} \mathbb{P}(Y = C \mid f_C(X) = z) d\mathbb{P}_{f_C(X)|C}(z) \stackrel{\text{a.s.}}{=} \int_{\sigma'} z d\mathbb{P}_{f_C(X)|C}(z), \quad \forall \sigma' \subset [0, 1] \\
&\iff \int_{[0, \sigma]} \mathbb{P}(Y = C \mid f_C(X) = z) d\mathbb{P}_{f_C(X)|C}(z) \stackrel{\text{a.s.}}{=} \int_{[0, \sigma]} z d\mathbb{P}_{f_C(X)|C}(z), \quad \forall \sigma \in [0, 1] \\
&\iff \mathbb{E}\left[\max_{\sigma \in [0, 1]} \left| \int_{[0, \sigma]} z - \mathbb{P}(Y = C \mid f_C(X) = z) d\mathbb{P}_{f_C(X)|C}(z) \right|\right] = 0 \\
&\iff \mathbb{E}[\text{KS}(f, C)] = 0 \\
&\iff \text{KS}(f) = 0
\end{aligned} \tag{10}$$

(i) according to Theorem 4.22 of Capiński & Kopp [5].

**Regarding**  $\text{TCE}_p(f) = 0 \implies \text{ECE}(f) = 0$ :

$$\begin{aligned}
\text{TCE}_p(f) = 0 &\iff \mathbb{P}(Y = C \mid f_C(X)) \stackrel{\text{a.s.}}{=} f_C(X) \\
&\stackrel{(i)}{\implies} \forall i = 1, \dots, m: \mathbb{P}(Y = C \mid f_C(X) \in B_i) \stackrel{\text{a.s.}}{=} \mathbb{E}[f_C(X) \mid f_C(X) \in B_i] \\
&\stackrel{\text{def 3}}{\iff} \text{ECE}(f) = 0
\end{aligned} \tag{11}$$

(i) with  $B_i$  defined as in definition 3; follows since  $\mathbb{P}(Y = C \mid f_C(X) \in B_i) = \int_{B_i} \mathbb{P}(Y = C \mid f_C(X) = z) d\mathbb{P}_{f_C(X)}(z) \stackrel{\text{a.s.}}{=} \int_{B_i} f_C(X) d\mathbb{P}_{f_C(X)}(z) = \mathbb{E}[f_C(X) \mid f_C(X) \in B_i]$ .

An intuition of why  $\text{TCE}_1(f) = 0 \not\Leftarrow \text{ECE}(f) = 0$  is given in example 3.2 of Kumar et al. [31].

**Regarding**  $2 \geq \text{BS}(f) \geq (\text{CE}_2(f))^2$ :

$$\begin{aligned}
2 &= \|e_1 - e_2\|_2^2 \\
&\geq \mathbb{E} \left[ \|f(X) - e_Y\|_2^2 \right] \\
&\stackrel{\text{def } \textcolor{red}{1}}{=} \text{BS}(f) \\
&\stackrel{(i)}{\geq} \text{BS}(f) - \mathbb{E} [g_{\text{BS}}(\mathbb{P}_{Y|f(X)})] \\
&\stackrel{\text{le } \textcolor{red}{12.1}}{=} \text{CE}_{\text{BS}}(f) \\
&\stackrel{(ii)}{=} (\text{CE}_2(f))^2
\end{aligned} \tag{12}$$

- (i)  $g_{\text{BS}}$  non-negative, follows from definition [C.6](#)  
(ii) compare definition [2](#) with the squared calibration term in [\[38\]](#).

**Regarding**  $n^{\frac{1}{p}-\frac{1}{q}} \text{CE}_q(f) \geq \text{CE}_p(f)$  for  $0 < p \leq q < \infty$ :

We use  $\Delta := f(X) - \mathbb{P}_{Y|f(X)}$  for shorter equations. Further, we use the  $p$ -norm inequality  $n^{\frac{1}{p}-\frac{1}{q}} \|x\|_q \geq \|x\|_p$  for a vector  $x \in \mathbb{R}^n$  and the  $L^p$  space inequality  $(\mathbb{E}[|X|^q])^{\frac{1}{q}} \geq (\mathbb{E}[|X|^p])^{\frac{1}{p}}$  for  $X \in L^q \subset L^p$  [\[5\]](#).

$$\begin{aligned}
&\text{CE}_p(f) \\
&\stackrel{\text{def } \textcolor{red}{2}}{=} \left( \mathbb{E} \left[ \|\Delta\|_p^p \right] \right)^{\frac{1}{p}} \\
&\leq \left( \mathbb{E} \left[ \left( n^{\frac{1}{p}-\frac{1}{q}} \|\Delta\|_q \right)^p \right] \right)^{\frac{1}{p}} \\
&= n^{\frac{1}{p}-\frac{1}{q}} \left( \mathbb{E} \left[ \|\Delta\|_q^p \right] \right)^{\frac{1}{p}} \\
&\leq n^{\frac{1}{p}-\frac{1}{q}} \left( \mathbb{E} \left[ \|\Delta\|_q^q \right] \right)^{\frac{1}{q}} \\
&\stackrel{\text{def } \textcolor{red}{2}}{=} n^{\frac{1}{p}-\frac{1}{q}} \text{CE}_q(f)
\end{aligned} \tag{13}$$

Note that this result is a direct contradiction to Theorem 1 of [\[56\]](#) since  $n^{\frac{1}{p}-\frac{1}{q}} > 1$ .

Further, the name ' $L^p$  calibration error' is unambiguous for canonical calibration since the following holds. Let  $\|\cdot\|_{\mathbb{R}^n, p}$  be the vector  $p$ -norm and  $\|\cdot\|_{L^p}$  the norm of the  $L^p$  space. Then we have

$$\text{CE}_p(f) = \left\| \|\Delta\|_{\mathbb{R}^n, p} \right\|_{L^p} = \|(\|\Delta_1\|_{L^p}, \dots, \|\Delta_n\|_{L^p})^\top\|_{\mathbb{R}^n, p}. \tag{14}$$

Thus, there is no ambiguity if we first compute the vector norm or the  $L^p$  norm and there cannot be another  $L^p$  calibration error with a different norm order.

**Regarding**  $n^{\frac{1}{p}-\frac{1}{2}} \sqrt{\text{BS}(f)} \geq \text{CE}_p(f)$  for  $0 < p \leq 2$ :

Combining equations [\(12\)](#) and [\(13\)](#) (with  $q = 2$ ) gives the result.

**Regarding**  $\text{CE}_p(f) \geq \text{CWCE}_p(f)$ :

In the following, we will use Tonelli's theorem to split the expectation into two and the Jensen's inequality for the convex function  $|\cdot|^p$ .

$$\begin{aligned}
(\text{CE}_p(f))^p &= \mathbb{E} \left[ \|f(X) - \mathbb{P}_{Y|f(X)}\|_p^p \right] \\
&= \sum_{k \in \mathcal{Y}} \mathbb{E} [|f_k(X) - \mathbb{P}(Y = k | f(X))|^p] \\
&\stackrel{\text{Tonelli}}{=} \sum_{k \in \mathcal{Y}} \mathbb{E}_{f_k(X)} [\mathbb{E}_{f-k(X)} [|f_k(X) - \mathbb{P}(Y = k | f(X))|^p | f_k(X)]] \\
&\stackrel{\text{Jensen}}{\geq} \sum_{k \in \mathcal{Y}} \mathbb{E}_{f_k(X)} [\|\mathbb{E}_{f-k(X)} [f_k(X) - \mathbb{P}(Y = k | f(X)) | f_k(X)]\|^p] \\
&= \sum_{k \in \mathcal{Y}} \mathbb{E}_{f_k(X)} [|f_k(X) - \mathbb{P}(Y = k | f_k(X))|^p] \\
&\stackrel{\text{def } \text{C.1}}{=} (\text{CWCE}_p(f))^p
\end{aligned} \tag{15}$$

**Regarding**  $\text{CWCE}_p(f) \geq \text{TCE}_p(f)$ :

We will use  $F := f(X)$  for shorter notation.

$$\begin{aligned}
(\text{CWCE}_p(f))^p &\stackrel{\text{def } \text{C.1}}{=} \sum_{k \in \mathcal{Y}} \mathbb{E}_{f_k(X)} [|f_k(X) - \mathbb{P}(Y = k | f_k(X))|^p] \\
&= \sum_{k \in \mathcal{Y}} \mathbb{E}_{F_k} [|F_k - \mathbb{P}(Y = k | F_k)|^p] \\
&= \sum_{k \in \mathcal{Y}} \mathbb{E}_F [|F_k - \mathbb{P}(Y = k | F_k)|^p] \\
&= \mathbb{E}_F \left[ \sum_{k \in \mathcal{Y}} |F_k - \mathbb{P}(Y = k | F_k)|^p \right] \\
&\stackrel{(i)}{=} \mathbb{E}_F \left[ \sum_{k \in \mathcal{Y}} |F_{(k)_F} - \mathbb{P}(Y = (k)_F | F_{(k)_F})|^p \right] \\
&\geq \mathbb{E}_F [|F_{(1)_F} - \mathbb{P}(Y = (1)_F | F_{(1)_F})|^p] \\
&\stackrel{(ii)}{=} \mathbb{E}_F [|F_C - \mathbb{P}(Y = C | F_C)|^p] \\
&= \mathbb{E}_{f(X)} [|f_C(X) - \mathbb{P}(Y = C | f_C(X))|^p] \\
&\stackrel{\text{def } \text{C.1}}{=} (\text{TCE}_p(f))^p
\end{aligned} \tag{16}$$

(i) Order all summands by  $F$ . We use notation of order statistics to refer to  $(k)_F$  the index with the  $k$ th highest rank according to  $F$ .

(ii) From (i) follows  $(1)_F = (1)_{f(X)} = \arg \max_k f_k(X) = C$ .

**Regarding**  $\text{TCE}_p(f) \geq \text{TCE}_1(f)$ :

Let  $p \geq q \geq 1$ . This makes  $(\cdot)^{\frac{p}{q}}$  a convex function for positive arguments. We will show the more general  $\text{TCE}_p(f) \geq \text{TCE}_q(f)$ . From this directly follows  $\text{TCE}_p(f) \geq \text{TCE}_1(f)$ .

$$\begin{aligned}
& \text{TCE}_p(f) \\
&= (\mathbb{E}[|f_C(X) - \mathbb{P}(Y = C | f_C(X))|^p])^{\frac{1}{p}} \\
&= \left( \mathbb{E} \left[ |f_C(X) - \mathbb{P}(Y = C | f_C(X))|^{q \frac{p}{q}} \right] \right)^{\frac{1}{p}} \\
&\stackrel{\text{Jensen}}{\geq} (\mathbb{E}[|f_C(X) - \mathbb{P}(Y = C | f_C(X))|^q])^{\frac{1}{p} \frac{p}{q}} \\
&= (\mathbb{E}[|f_C(X) - \mathbb{P}(Y = C | f_C(X))|^q])^{\frac{1}{q}} \\
&= \text{TCE}_q(f)
\end{aligned} \tag{17}$$

**Regarding**  $\text{TCE}_1(f) \geq \text{KS}(f)$ :

We will show the more general  $\text{TCE}_p(f) \geq \text{KS}(f)$ , from which  $\text{TCE}_1(f) \geq \text{KS}(f)$  follows.

We will make use of the indicator function for a set  $A$  defined as  $\mathbb{1}_A(a) = \begin{cases} 1, & a \in A \\ 0, & \text{else.} \end{cases}$

$$\begin{aligned}
& (\text{TCE}_p(f))^p = \mathbb{E}[|f_C(X) - \mathbb{P}(Y = C | f_C(X))|^p] \\
&\stackrel{\text{Tonelli}}{=} \mathbb{E}_C[\mathbb{E}_{f_C(X)}[|f_C(X) - \mathbb{P}(Y = C | f_C(X))|^p | C]] \\
&= \mathbb{E}_C[\mathbb{E}_{f_C(X)}[\mathbb{1}_{[0,1]}(f_C(X)) |f_C(X) - \mathbb{P}(Y = C | f_C(X))|^p | C]] \\
&\stackrel{(i)}{=} \mathbb{E}_C \left[ \max_{\sigma \in [0,1]} \mathbb{E}_{f_C(X)}[\mathbb{1}_{[0,\sigma]}(f_C(X)) |f_C(X) - \mathbb{P}(Y = C | f_C(X))|^p | C] \right] \\
&= \mathbb{E}_C \left[ \max_{\sigma \in [0,1]} \mathbb{E}_{f_C(X)}[\mathbb{1}_{[0,\sigma]}(f_C(X)) (f_C(X) - \mathbb{P}(Y = C | f_C(X)))^p | C] \right] \\
&\stackrel{\text{Jensen}}{\geq} \mathbb{E}_C \left[ \max_{\sigma \in [0,1]} |\mathbb{E}_{f_C(X)}[\mathbb{1}_{[0,\sigma]}(f_C(X)) (f_C(X) - \mathbb{P}(Y = C | f_C(X))) | C]|^p \right] \\
&= \mathbb{E}_C \left[ \max_{\sigma \in [0,1]} \left| \int_{[0,1]} \mathbb{1}_{[0,\sigma]}(z) (z - \mathbb{P}(Y = C | f_C(X) = z)) d\mathbb{P}_{f_C(X)|C}(z) \right|^p \right] \\
&= \mathbb{E}_C \left[ \max_{\sigma \in [0,1]} \left| \int_{[0,\sigma]} z - \mathbb{P}(Y = C | f_C(X) = z) d\mathbb{P}_{f_C(X)|C}(z) \right|^p \right] \\
&\stackrel{\text{Jensen}}{\geq} \left( \mathbb{E}_C \left[ \max_{\sigma \in [0,1]} \left| \int_{[0,\sigma]} z - \mathbb{P}(Y = C | f_C(X) = z) d\mathbb{P}_{f_C(X)|C}(z) \right| \right] \right)^p \\
&\stackrel{\text{def } \textcolor{red}{C.2}}{=} (\mathbb{E}_C[\text{KS}(f, C)])^p \\
&\stackrel{\text{def } \textcolor{red}{C.2}}{=} (\text{KS}(f))^p
\end{aligned} \tag{18}$$

$$(i) \quad \sigma \geq \sigma' \implies \mathbb{1}_{[0,\sigma]}(f_C(X)) |f_C(X) - \mathbb{P}(Y = C | f_C(X))|^p \geq \mathbb{1}_{[0,\sigma']} (f_C(X)) |f_C(X) - \mathbb{P}(Y = C | f_C(X))|^p \geq 0.$$

**Regarding**  $\text{TCE}_1(f) \geq c \cdot \text{MMCE}(f)$ :

This is given in the proof of Theorem 3 of Kumar et al. [30]. Note that Kumar et al. [30] used ECE in their theorem, but their proof is actually given for  $\text{TCE}_1$ . Since  $\text{ECE}(f) = 0 \not\Rightarrow \text{MMCE}(f) = 0$ , we have  $\text{ECE}(f) \not\geq c \cdot \text{MMCE}(f)$ .

**Regarding**  $\text{TCE}_1(f) \geq \text{ECE}(f)$ :

A similar statement for binary models is given in Proposition 3.3 of Kumar et al. [31] or for general models in Theorem 2 of Vaicenavicius et al. [53]. Since our formulations differ, we provide an independent proof.

We will write  $B_i := (\frac{i-1}{m}, \frac{i}{m}]$ . Let  $\mathcal{B} := \sigma(\{B_1, \dots, B_m\})$  be the  $\sigma$ -algebra generated by the binning scheme of size  $m \in \mathbb{N}$  used for the ECE.

$$\begin{aligned}
\text{TCE}_1(f) &= \mathbb{E}[|f_C(X) - \mathbb{P}(Y = C | f_C(X))|] \\
&= \mathbb{E}[\mathbb{E}[|f_C(X) - \mathbb{P}(Y = C | f_C(X))| | \mathcal{B}]] \\
&\stackrel{(i)}{\geq} \mathbb{E}[|\mathbb{E}[f_C(X) - \mathbb{P}(Y = C | f_C(X)) | \mathcal{B}]|] \\
&= \mathbb{E}[|\mathbb{E}[f_C(X) | \mathcal{B}] - \mathbb{P}(Y = C | \mathbb{E}[f_C(X) | \mathcal{B}])|] \\
&= \sum_{i=1}^m \mathbb{P}(f(X) \in B_i) \cdot \\
&\quad |\mathbb{E}[f_C(X) | f(X) \in B_i] - \mathbb{P}(Y = C | f(X) \in B_i)| \\
&\stackrel{\text{def } \textcolor{red}{3}}{=} \text{ECE}(f)
\end{aligned} \tag{19}$$

(i) We use conditional Jensen's inequality [\[5\]](#).

□

### D.3 Proposition [3.2](#)

For all  $\epsilon > 0$  and surjective  $f: \mathcal{X} \rightarrow \mathcal{P}_n$  there exists a joint distribution  $\mathbb{P}_{X,Y}$  such that for all  $E \in \{\text{MMCE}, \text{KS}, \text{ECE}, \text{TCE}_p, \text{CWCE}_p \mid 1 \leq p \in \mathbb{R}\}$ :

$$E(f) = 0 \quad \wedge \quad \text{CE}_2(f) \geq 1 - \frac{1}{n} - \epsilon.$$

*Proof.* Assume arbitrary  $\epsilon > 0$  and surjective  $f: \mathcal{X} \rightarrow \mathbb{P}_n$ . Choose  $\mathbb{P}_{X,Y}$  such that  $\mathbb{E}[\|f(X)\|_2^2] \leq \frac{1}{n} + \epsilon$  and

$$\mathbb{P}(Y = k | f(X)) = \begin{cases} 1 & , \text{ with probability } f_k(X) \\ 0 & , \text{ else.} \end{cases}$$

This is possible, since  $\|\cdot\|_2^2: \mathcal{P}_n \rightarrow [\frac{1}{n}, 1]$  and  $f$  are surjective, from which follows  $\forall \epsilon > 0 \exists x \in \mathcal{X}: \frac{1}{n} + \epsilon \geq \|f(x)\|_2^2$ .

Write  $F := f(X)$  and  $\mathbf{Y} := e_Y$  (one-hot encoded  $Y$ ).

Then we have  $\mathbb{P}(Y = k | F_k) = \mathbb{E}[\mathbf{Y}_k | F_k] = \mathbb{E}_{F-k}[\mathbb{E}[\mathbf{Y}_k | F] | F_k] = F_k$  and consequently  $\text{CWCE}_p(f) = 0$ . The other errors follow from Theorem [3.1](#). But we also have

$$\begin{aligned}
(\text{CE}_2(f))^2 &= \mathbb{E} \left[ \left\| \mathbb{P}_{Y|f(X)} - f(X) \right\|_2^2 \right] \\
&= \mathbb{E} \left[ \left\| \mathbb{E}[\mathbf{Y} | F] - F \right\|_2^2 \right] \\
&= \sum_{k \in \mathcal{Y}} \mathbb{E} \left[ (\mathbb{E}[\mathbf{Y}_k | F] - F_k)^2 \right] \\
&= \sum_{k \in \mathcal{Y}} \mathbb{E} \left[ (\mathbb{E}[\mathbf{Y}_k | F])^2 \right] - 2\mathbb{E}[\mathbb{E}[\mathbf{Y}_k | F] F_k] + \mathbb{E}[F_k^2] \\
&= \sum_{k \in \mathcal{Y}} \mathbb{E}[\mathbb{E}[\mathbf{Y}_k | F]] - 2\mathbb{E}[\mathbb{E}[\mathbf{Y}_k | F] F_k] + \mathbb{E}[F_k^2] \\
&= 1 - 2 \sum_{k \in \mathcal{Y}} \mathbb{E}[\mathbb{E}[\mathbf{Y}_k | F] F_k] + \sum_{k \in \mathcal{Y}} \mathbb{E}[F_k^2] \\
&= 1 - 2 \sum_{k \in \mathcal{Y}} \mathbb{E}[\mathbb{E}[\mathbf{Y}_k | F_k] F_k] + \sum_{k \in \mathcal{Y}} \mathbb{E}[F_k^2] \\
&= 1 - 2 \sum_{k \in \mathcal{Y}} \mathbb{E}[F_k^2] + \sum_{k \in \mathcal{Y}} \mathbb{E}[F_k^2] \\
&= 1 - \sum_{k \in \mathcal{Y}} \mathbb{E}[F_k^2] \\
&= 1 - \mathbb{E} \left[ \|F\|_2^2 \right] \\
&\geq 1 - \frac{1}{n} - \epsilon
\end{aligned} \tag{20}$$

□

#### D.4 Proposition D.2

Proposition 3.2 tells us about the existence of settings such that common errors are insufficient to capture miscalibration. We might still wonder how likely it is to encounter such a situation in practice. Indeed, we can come up with a recalibration transformation that is *perfect* according to these errors and accuracy-preserving but not calibrated. For this, assume that  $f: \mathcal{X} \rightarrow \mathcal{P}_n$  is a trained model. Define  $t^f: \mathcal{P}_n \rightarrow \mathcal{P}_n$  to replace the largest entry in its input with the accuracy of model  $f$ . The other entries are set such that the output is a unit vector. A more formal definition is provided in the proof.

**Proposition D.2.** *For all models  $f: \mathcal{X} \rightarrow \mathcal{P}_n$  and  $E \in \{\text{MMCE}, \text{KS}, \text{ECE}, \text{TCE}_p \mid 1 \leq p \in \mathbb{R}\}$  we have*

$$E(t^f \circ f) = 0 \quad \text{and} \quad \text{ACC}(t^f \circ f) = \text{ACC}(f).$$

*But,  $t^f \circ f$  is not calibrated in general.*

*Proof.* Assume we are given a model  $f: \mathcal{X} \rightarrow \mathcal{P}_n$ .

Define  $\sigma: \mathcal{P}_n \times \mathcal{P}_n \rightarrow \mathcal{P}_n$  to order the entries of its second input according to the values given in the first input. Let  $\sigma^{-1}: \mathcal{P}_n \times \mathcal{P}_n \rightarrow \mathcal{P}_n$  revert the ordering in the second input according to the entries of its first input. For easier notation, we will write  $\sigma_u(v) := \sigma(u, v)$  and  $\sigma_u^{-1}(v) := \sigma^{-1}(u, v)$ , which gives  $\forall u, v \in \mathcal{P}: \sigma_u^{-1} \circ \sigma_u(v) = v$ . I.e.  $\sigma_u^{-1}$  is the inverse of  $\sigma_u$  given  $u$ .

Define  $c_f := \left( \text{ACC}(f), \frac{1 - \text{ACC}(f)}{n-1}, \dots, \frac{1 - \text{ACC}(f)}{n-1} \right)^\top \in \mathcal{P}_n$ .

Now, we can give a formal definition of  $t^f$ , which is defined as  $t^f(p) = \sigma_p^{-1}(c_f)$ .

**Regarding accuracy:**

We will use  $[\cdot]_k$  to denote entry with index  $k$  of the expression inside the brackets. Since we can assume  $\text{ACC}(f) > \frac{1-\text{ACC}(f)}{n-1}$  in every practical setting, we have

$$\begin{aligned}
& \arg \max_k t_k^f \circ f(X) \\
&= \arg \max_k \left[ \sigma_{f(X)}^{-1}(c_f) \right]_k \\
&\stackrel{(i)}{=} \arg \max_k \left[ \sigma_{f(X)}^{-1} \circ \sigma_{f(X)}(f(X)) \right]_k \\
&= \arg \max_k [f(X)]_k \\
&= \arg \max_k f_k(X).
\end{aligned} \tag{21}$$

(i)  $c_f$  and  $\sigma_{f(X)}(f(X))$  have their largest entry at index  $k = 1$ .

This states that  $t^f$  is accuracy-preserving.

#### Regarding zero TCE:

Note that  $\text{ACC}(f) = \mathbb{P}(Y = \arg \max_k f_k(X))$ . Using this, we have  $\mathbb{P}(Y = \arg \max_k t_k^f \circ f(X) \mid \max_k t_k^f \circ f(X)) = \mathbb{P}(Y = \arg \max_k f_k(X) \mid \text{ACC}(f)) = \mathbb{P}(Y = \arg \max_k f_k(X)) = \text{ACC}(f) = \max_k t_k^f \circ f(X)$ . It follows  $\text{TCE}_p(t^f \circ f) = 0$ .

Proof for the other errors follows from Theorem 3.1

□

Even though  $t^f$  is the perfect transformation according to ECE and accuracy, it is not the correct choice if the whole model prediction is relevant and supposed to be calibrated.

#### D.5 Proposition 3.3

We will write  $\hat{Y} = \arg \max_k f_k(X)$  for the top-label prediction of classifier  $f$ .

Define

$$\mu_{(n)} = \sum_{i=1}^m p_i \left\{ \sqrt{\frac{2}{\pi}} \sigma_i \exp\left(-\frac{\mu_i^2}{2\sigma_i^2}\right) + \mu_i \left[1 - 2\Phi\left(-\frac{\mu_i}{\sigma_i}\right)\right] \right\} \tag{22}$$

with

$$\mu_i = \underbrace{\mathbb{E}[f_C(X) \mid f_C(X) \in B_i]}_{=\text{conf}_i} - \underbrace{\mathbb{P}(Y = \hat{Y} \mid f_C(X) \in B_i)}_{=\text{acc}_i} \tag{23}$$

as the true unknown difference between model confidence and model accuracy in bin  $i$ ,

$$\sigma_i^2 = \frac{1}{n_i} \underbrace{\mathbb{V}[f_C(X) \mid f_C(X) \in B_i]}_{V_i^{\text{conf}}:=} + \frac{1}{n_i} \underbrace{\text{acc}_i(1 - \text{acc}_i)}_{V_i^{\text{acc}}:=} \tag{24}$$

as the combined model and accuracy sample variance in bin  $i$ , and  $\Phi$  as the cumulative distribution function (cdf) of a standard normal distribution.

The ECE for data size  $n$  and  $m$  bins is estimated by

$$\widehat{\text{ECE}}_{(n)} = \sum_{i=1}^m \hat{p}_i \left| \hat{\text{acc}}_i - \hat{\text{conf}}_i \right| \tag{25}$$

where  $\hat{p}_i = \frac{n_i}{n}$  is the estimated bin frequency,  $\hat{\text{acc}}_i = \frac{1}{n_i} \sum_j \mathbb{1}\{\hat{Y}_j = Y_j \wedge \hat{Y}_j \in B_i\}$  the estimated bin accuracy,  $\hat{\text{conf}}_i = \frac{1}{n_i} \sum_j \hat{Y}_j \mathbb{1}\{\hat{Y}_j \in B_i\}$  the estimated bin confidence, and  $n_i =$

$\sum_j \mathbb{1} \left\{ \hat{Y}_j \in B_i \right\}$  is the number of data instances in bin  $i$ . We assume equal width binning, i.e.  $B_i = \left( \frac{i-m}{m}, \frac{i}{m} \right]$ .

We have

$$\mathbb{E} \left[ \hat{\text{ECE}}_{(n)} \right] \approx \mu_{(n)} \geq \text{ECE} \quad , \quad \frac{d\mu_{(n)}}{dn} < 0 \quad , \quad \frac{d^2\mu_{(n)}}{(dn)^2} > 0 \quad \text{and} \quad \frac{d^2\mu_{(n)}}{dn \, d\text{ECE}} > 0.$$

*Proof.* First,

$$\begin{aligned} & \mathbb{E} \left[ \hat{\text{ECE}}_{(n)} \right] \\ & \stackrel{\text{def}}{=} \mathbb{E} \left[ \sum_{i=1}^m \hat{p}_i \left| \text{acc}_i - \text{conf}_i \right| \right] \\ & \stackrel{\text{def}}{=} \mathbb{E} \left[ \sum_{i=1}^m \frac{1}{n} \sum_{j=1}^n \mathbb{1} \left\{ \hat{Y}_j \in B_i \right\} \left| \text{acc}_i - \text{conf}_i \right| \right] \\ & = \frac{1}{n} \sum_{j=1}^n \mathbb{E} \left[ \sum_{i=1}^m \mathbb{1} \left\{ \hat{Y}_j \in B_i \right\} \left| \text{acc}_i - \text{conf}_i \right| \right] \\ & = \frac{1}{n} \sum_{i=1}^m \mathbb{E} \left[ \sum_{j=1}^n \mathbb{1} \left\{ \hat{Y}_j \in B_i \right\} \mathbb{E} \left[ \left| \text{acc}_i - \text{conf}_i \right| \mid \hat{Y}_j \right] \right] \\ & \stackrel{(i)}{\approx} \frac{1}{n} \sum_{j=1}^n \sum_{i=1}^m \mathbb{E} \left[ \mathbb{1} \left\{ \hat{Y}_j \in B_i \right\} \right] \mathbb{E} \left[ \left| \text{acc}_i - \text{conf}_i \right| \right] \\ & \stackrel{\text{iid}}{=} \sum_{i=1}^m \mathbb{P} \left( \hat{Y} \in B_i \right) \mathbb{E} \left[ \left| \text{acc}_i - \text{conf}_i \right| \right] \end{aligned} \tag{26}$$

(i) 'knowing' a single summand in a mean estimator does not change much.

As one can see, the ECE estimator approximately consists of several  $\mathbb{E} \left[ \left| \text{acc}_i - \text{conf}_i \right| \right]$ . According to the central limit theorem (CLT), we have  $\lim_{n_i \rightarrow \infty} \left( \frac{\text{acc}_i - \text{acc}_i}{\sqrt{V_i^{\text{acc}}/n_i}} \right) \sim \mathcal{N}(0, 1)$  and  $\lim_{n_i \rightarrow \infty} \left( \frac{\text{conf}_i - \text{conf}_i}{\sqrt{V_i^{\text{conf}}/n_i}} \right) \sim \mathcal{N}(0, 1)$ . We assume  $\text{acc}_i$  and  $\text{conf}_i$  approximately follow the normal distributions given by the CLT, i.e.  $\text{acc}_i \sim \mathcal{N} \left( \text{acc}_i, \frac{V_i^{\text{acc}}}{n_i} \right)$  and  $\text{conf}_i \sim \mathcal{N} \left( \text{conf}_i, \frac{V_i^{\text{conf}}}{n_i} \right)$ . This gives  $\text{acc}_i - \text{conf}_i \sim \mathcal{N} \left( \text{acc}_i - \text{conf}_i, \frac{V_i^{\text{conf}} + V_i^{\text{acc}}}{n_i} \right)$ .<sup>4</sup> If  $X \sim \mathcal{N}(\mu, \sigma^2)$ , then  $|X|$  is a folded normal distribution (FN) with  $\mathbb{E}[|X|] = \sqrt{\frac{2}{\pi}} \sigma \exp \left( -\frac{\mu^2}{2\sigma^2} \right) + \mu \left[ 1 - 2\Phi \left( -\frac{\mu}{\sigma} \right) \right]$  with  $\Phi$  the cdf of a standard normal distribution [52]. We also have

$$\sqrt{\frac{2}{\pi}} \sigma \exp \left( -\frac{\mu^2}{2\sigma^2} \right) + \mu \left[ 1 - 2\Phi \left( -\frac{\mu}{\sigma} \right) \right] = \mathbb{E}[|X|] \geq |\mathbb{E}[X]| = |\mu| \tag{27}$$

(by Jensen's inequality) and

<sup>4</sup>[http://www.stat.ucla.edu/~nchristo/introstatistics/introstats\\_normal\\_linear\\_combinations.pdf](http://www.stat.ucla.edu/~nchristo/introstatistics/introstats_normal_linear_combinations.pdf)

$$\begin{aligned}
\frac{d}{d\sigma} \mathbb{E}[|X|] &= \frac{d}{d\sigma} \left( \sqrt{\frac{2}{\pi}} \sigma \exp\left(-\frac{\mu^2}{2\sigma^2}\right) + \mu \left[1 - 2\Phi\left(-\frac{\mu}{\sigma}\right)\right] \right) \\
&= \sqrt{\frac{2}{\pi}} \exp\left(-\frac{\mu^2}{2\sigma^2}\right) + \sqrt{\frac{2}{\pi}} \sigma \exp\left(-\frac{\mu^2}{2\sigma^2}\right) \frac{\mu^2}{\sigma^3} - \mu 2\phi\left(-\frac{\mu}{\sigma}\right) \frac{\mu}{\sigma^2} \\
&= \sqrt{\frac{2}{\pi}} \exp\left(-\frac{\mu^2}{2\sigma^2}\right) + \sqrt{\frac{2}{\pi}} \exp\left(-\frac{\mu^2}{2\sigma^2}\right) \frac{\mu^2}{\sigma^2} - \frac{2}{\sqrt{2\pi}} \exp\left(-\frac{\mu^2}{2\sigma^2}\right) \frac{\mu^2}{\sigma^2} \\
&= \sqrt{\frac{2}{\pi}} \exp\left(-\frac{\mu^2}{2\sigma^2}\right).
\end{aligned} \tag{28}$$

Consequently,  $|\hat{\text{acc}}_i - \hat{\text{conf}}_i|$  follows approximately a folded normal distribution with

$$\mathbb{E}[|\hat{\text{acc}}_i - \hat{\text{conf}}_i|] \approx \sqrt{\frac{2}{\pi}} \sigma_i \exp\left(-\frac{\mu_i^2}{2\sigma_i^2}\right) + \mu_i \left[1 - 2\Phi\left(-\frac{\mu_i}{\sigma_i}\right)\right] \tag{29}$$

where  $\mu_i$  and  $\sigma_i$  are defined as above in equations (23) and (24).

Consequently, by combining equations (27), (29) and (26) we get the first result:

$$\begin{aligned}
\mathbb{E}[\text{ECE}_{(n)}] &\approx \underbrace{\sum_{i=1}^m p_i \left\{ \sqrt{\frac{2}{\pi}} \sigma_i \exp\left(-\frac{\mu_i^2}{2\sigma_i^2}\right) + \mu_i \left[1 - 2\Phi\left(-\frac{\mu_i}{\sigma_i}\right)\right] \right\}}_{=\mu_{(n)}} \\
&\geq \sum_{i=1}^m p_i |\mu_i| \\
&= \sum_{i=1}^m p_i |\text{acc}_i - \text{conf}_i| \\
&= \text{ECE}
\end{aligned} \tag{30}$$

As we can see, the average outcome depends on  $\sigma_i$ , which further depends on  $n_i$ , i.e. the data size influences our expected result. To get the next result, which shows the trend of this influence, we calculate the first derivative:

$$\begin{aligned}
& \frac{d}{dn} \mu_{(n)} \\
&= \frac{d}{dn} \sum_{i=1}^m p_i \left\{ \sqrt{\frac{2}{\pi}} \sigma_i \exp\left(-\frac{\mu_i^2}{2\sigma_i^2}\right) + \mu_i \left[1 - 2\Phi\left(-\frac{\mu_i}{\sigma_i}\right)\right] \right\} \\
&= \sum_{j=1}^m \frac{dn_j}{dn} \frac{d\sigma_j}{dn_j} \frac{d}{d\sigma_j} \sum_{i=1}^m p_i \left\{ \sqrt{\frac{2}{\pi}} \sigma_i \exp\left(-\frac{\mu_i^2}{2\sigma_i^2}\right) + \mu_i \left[1 - 2\Phi\left(-\frac{\mu_i}{\sigma_i}\right)\right] \right\} \\
&= \sum_{j=1}^m \frac{dn_j}{dn} \frac{d\sigma_j}{dn_j} \frac{d}{d\sigma_j} p_j \left\{ \sqrt{\frac{2}{\pi}} \sigma_j \exp\left(-\frac{\mu_j^2}{2\sigma_j^2}\right) + \mu_j \left[1 - 2\Phi\left(-\frac{\mu_j}{\sigma_j}\right)\right] \right\} \\
&\stackrel{(28)}{=} \sum_{j=1}^m \frac{dn_j}{dn} \frac{d\sigma_j}{dn_j} p_j \sqrt{\frac{2}{\pi}} \exp\left(-\frac{\mu_j^2}{2\sigma_j^2}\right) \\
&= \sum_{j=1}^m \frac{dn_j}{dn} \frac{-\sqrt{V_j^{\text{conf}} + V_j^{\text{acc}}}}{2n_j^{3/2}} p_j \sqrt{\frac{2}{\pi}} \exp\left(-\frac{\mu_j^2}{2\sigma_j^2}\right) \\
&= \sum_{j=1}^m 1 \cdot \underbrace{\frac{-\sqrt{V_j^{\text{conf}} + V_j^{\text{acc}}}}{2n_j^{3/2}}}_{<0} p_j \underbrace{\sqrt{\frac{2}{\pi}} \exp\left(-\frac{\mu_j^2}{2\sigma_j^2}\right)}_{>0}.
\end{aligned} \tag{31}$$

This means  $\mu_{(n)}$  is monotonically decreasing with growing data size.

Next, we have

$$\begin{aligned}
& \frac{d^2}{(dn)^2} \mu_{(n)} \\
&\stackrel{(31)}{=} \frac{d}{dn} \sum_{j=1}^m \frac{-\sqrt{V_j^{\text{conf}} + V_j^{\text{acc}}}}{2n_j^{3/2}} p_j \sqrt{\frac{2}{\pi}} \exp\left(-\frac{\mu_j^2}{2\sigma_j^2}\right) \\
&= \frac{d}{dn} \sum_{j=1}^m \frac{-\sqrt{V_j^{\text{conf}} + V_j^{\text{acc}}}}{2n_j^{3/2}} p_j \sqrt{\frac{2}{\pi}} \exp\left(-\frac{\mu_j^2 n_j}{2V_j^{\text{conf}} + 2V_j^{\text{acc}}}\right) \\
&= \sum_{i=1}^m \frac{dn_i}{dn} \frac{d}{dn_i} \sum_{j=1}^m \frac{-\sqrt{V_j^{\text{conf}} + V_j^{\text{acc}}}}{2n_j^{3/2}} p_j \sqrt{\frac{2}{\pi}} \exp\left(-\frac{\mu_j^2 n_j}{2V_j^{\text{conf}} + 2V_j^{\text{acc}}}\right) \\
&= \sum_{i=1}^m 1 \cdot \frac{d}{dn_i} \frac{-\sqrt{V_i^{\text{conf}} + V_i^{\text{acc}}}}{2n_i^{3/2}} p_i \sqrt{\frac{2}{\pi}} \exp\left(-\frac{\mu_i^2 n_i}{2V_i^{\text{conf}} + 2V_i^{\text{acc}}}\right) \\
&= \sum_{i=1}^m \underbrace{\frac{3\sqrt{V_i^{\text{conf}} + V_i^{\text{acc}}}}{4n_i^{5/2}} p_i \sqrt{\frac{2}{\pi}} \exp\left(-\frac{\mu_i^2 n_i}{2V_i^{\text{conf}} + 2V_i^{\text{acc}}}\right)}_{>0} \\
&\quad + \underbrace{\frac{\sqrt{V_i^{\text{conf}} + V_i^{\text{acc}}}}{2n_i^{3/2}} p_i \sqrt{\frac{2}{\pi}} \exp\left(-\frac{\mu_i^2 n_i}{2V_i^{\text{conf}} + 2V_i^{\text{acc}}}\right) \frac{\mu_i^2}{2V_i^{\text{conf}} + 2V_i^{\text{acc}}}}_{>0}.
\end{aligned} \tag{32}$$

This means, in combination with the previous result,  $\mu_{(n)}$  is a strictly convex and monotonically decreasing function of the data size  $n_b$ . The ECE estimate is increasingly sensitive to the data size for smaller data sizes, while for larger data sizes the sensitivity vanishes.

Next, we analyze how the goodness of calibration influences this behaviour. Recall that  $\mu_i = \text{acc}_i - \text{conf}_i$ , i.e.  $\mu_i^2$  is the ground truth squared calibration error of bin  $i$ . We have

$$\begin{aligned}
& \frac{d^2}{dn d\mu_i^2} \mu(n) \\
& \stackrel{(31)}{=} \frac{d}{d\mu_i^2} \sum_{j=1}^m \frac{-\sqrt{V_j^{\text{conf}} + V_j^{\text{acc}}}}{2n_j^{3/2}} p_j \sqrt{\frac{2}{\pi}} \exp\left(-\frac{\mu_j^2}{2\sigma_j^2}\right) \\
& = \frac{d}{d\mu_i^2} \frac{-\sqrt{V_i^{\text{conf}} + V_i^{\text{acc}}}}{2n_i^{3/2}} p_i \sqrt{\frac{2}{\pi}} \exp\left(-\frac{\mu_i^2}{2\sigma_i^2}\right) \\
& = \underbrace{\frac{\sqrt{V_i^{\text{conf}} + V_i^{\text{acc}}}}{4n_i^{3/2} \sigma_i^2} p_i \sqrt{\frac{2}{\pi}} \exp\left(-\frac{\mu_i^2}{2\sigma_i^2}\right)}_{>0}
\end{aligned} \tag{33}$$

Consequently, if  $\mu_i^2$  increases (i.e. calibration gets worse), the gradient  $\frac{d}{dn} \mathbb{E} [\hat{\text{ECE}}_{(n)}]$  monotonically approaches zero from beneath. Contrary, the gradient is the highest when  $\mu_i = 0$ . In other words, the sensitivity of the ECE estimate w.r.t. the data size monotonically depends on the goodness of calibration. With better calibration, the sensitivity gradually gets worse.

Further, we have

$$\begin{aligned}
& \frac{d\mu_i^2}{d\text{ECE}} \\
& = \frac{d}{d\text{ECE}} (\text{acc}_i - \text{conf}_i)^2 \\
& = \frac{d}{d\text{ECE}} |\text{acc}_i - \text{conf}_i|^2 \\
& = \frac{d}{d\text{ECE}} \left( \frac{\text{ECE} - \sum_{j \neq i} p_j |\text{acc}_j - \text{conf}_j|}{p_i} \right)^2 \\
& = 2 \underbrace{\frac{\text{ECE} - \sum_{j \neq i} p_j |\text{acc}_j - \text{conf}_j|}{p_i^2}}_{>0}.
\end{aligned} \tag{34}$$

Combining equations (33) and (34) gives  $\frac{d^2}{dn d\text{ECE}} \mu(n) > 0$  as stated in the proposition.  $\square$

## D.6 Lemma 4.1

Let  $\mathcal{P}$  be a set of arbitrary distributions for which exists a proper score  $S$ . Assume we have random variables  $Q$  and  $Y$  with  $Q, \mathbb{P}_Y, \mathbb{P}_{Y|Q} \in \mathcal{P}$  for which  $g_S(\mathbb{P}_Y), \mathbb{E}[g_S(\mathbb{P}_{Y|Q})], \mathbb{E}[|S(Q, Y)|], \mathbb{E}[|S(\mathbb{P}_Y, Y)|] < \infty$ . The last two expectations are required for Fubini's theorem.

$$\begin{aligned}
\mathbb{E}[S(Q, Y)] &= \int S(q, y) d\mathbb{P}_{Y, Q}(y, q) \\
&\stackrel{\text{Fubini}}{=} \int \int S(q, y) d\mathbb{P}_{Y|Q=q}(y) d\mathbb{P}_Q(q) \\
&\stackrel{\text{def } \textcolor{red}{C.5}}{=} \int s_S(q, \mathbb{P}_{Y|Q=q}) d\mathbb{P}_Q(q) \\
&= \mathbb{E}[s_S(Q, \mathbb{P}_{Y|Q})] \\
&= \mathbb{E}[s_S(\mathbb{P}_{Y|Q}, \mathbb{P}_{Y|Q})] + \mathbb{E}[s_S(Q, \mathbb{P}_{Y|Q})] - \mathbb{E}[s_S(\mathbb{P}_{Y|Q}, \mathbb{P}_{Y|Q})] \\
&\stackrel{\text{def } \textcolor{red}{C.6}}{=} \mathbb{E}[s_S(\mathbb{P}_{Y|Q}, \mathbb{P}_{Y|Q})] + \mathbb{E}[d_S(Q, \mathbb{P}_{Y|Q})] \\
&= s_S(\mathbb{P}_Y, \mathbb{P}_Y) - s_S(\mathbb{P}_Y, \mathbb{P}_Y) + \mathbb{E}[s_S(\mathbb{P}_{Y|Q}, \mathbb{P}_{Y|Q})] + \mathbb{E}[d_S(Q, \mathbb{P}_{Y|Q})] \\
&\stackrel{\text{def } \textcolor{red}{C.5}}{=} s_S(\mathbb{P}_Y, \mathbb{P}_Y) - \int S(\mathbb{P}_Y, y) d\mathbb{P}_Y(y) + \mathbb{E}[s_S(\mathbb{P}_{Y|Q}, \mathbb{P}_{Y|Q})] + \mathbb{E}[d_S(Q, \mathbb{P}_{Y|Q})] \\
&= s_S(\mathbb{P}_Y, \mathbb{P}_Y) - \int S(\mathbb{P}_Y, y) \underbrace{d\mathbb{P}_{Q|Y=y}(q) d\mathbb{P}_Y(y)}_{=1} + \mathbb{E}[s_S(\mathbb{P}_{Y|Q}, \mathbb{P}_{Y|Q})] + \mathbb{E}[d_S(Q, \mathbb{P}_{Y|Q})] \\
&= s_S(\mathbb{P}_Y, \mathbb{P}_Y) - \int S(\mathbb{P}_Y, y) d\mathbb{P}_{Y, Q}(y, q) + \mathbb{E}[s_S(\mathbb{P}_{Y|Q}, \mathbb{P}_{Y|Q})] + \mathbb{E}[d_S(Q, \mathbb{P}_{Y|Q})] \\
&\stackrel{\text{Fubini}}{=} s_S(\mathbb{P}_Y, \mathbb{P}_Y) - \int \int S(\mathbb{P}_Y, y) d\mathbb{P}_{Y|Q=q}(y) d\mathbb{P}_Q(q) + \mathbb{E}[s_S(\mathbb{P}_{Y|Q}, \mathbb{P}_{Y|Q})] + \mathbb{E}[d_S(Q, \mathbb{P}_{Y|Q})] \\
&\stackrel{\text{def } \textcolor{red}{C.5}}{=} s_S(\mathbb{P}_Y, \mathbb{P}_Y) - \int s_S(\mathbb{P}_Y, \mathbb{P}_{Y|Q=q}) d\mathbb{P}_Q(q) + \mathbb{E}[s_S(\mathbb{P}_{Y|Q}, \mathbb{P}_{Y|Q})] + \mathbb{E}[d_S(Q, \mathbb{P}_{Y|Q})] \\
&= s_S(\mathbb{P}_Y, \mathbb{P}_Y) - \mathbb{E}[s_S(\mathbb{P}_Y, \mathbb{P}_{Y|Q})] + \mathbb{E}[s_S(\mathbb{P}_{Y|Q}, \mathbb{P}_{Y|Q})] + \mathbb{E}[d_S(Q, \mathbb{P}_{Y|Q})] \\
&\stackrel{\text{def } \textcolor{red}{C.6}}{=} \underbrace{g_S(\mathbb{P}_Y)}_{\text{generalized entropy}} - \underbrace{\mathbb{E}[d_S(\mathbb{P}_Y, \mathbb{P}_{Y|Q})]}_{\text{sharpness}} + \underbrace{\mathbb{E}[d_S(Q, \mathbb{P}_{Y|Q})]}_{\text{calibration}}.
\end{aligned}$$

## D.7 Theorem 4.3

For all proper calibration errors with  $\inf_{P \in \mathcal{P}} g_S(P) \in \mathbb{R}$ , there exists an associated **calibration upper bound**

$$\mathcal{U}_S(f) \geq \text{CE}_S(f)$$

defined as  $\mathcal{U}_S(f) := \mathbb{E}[S(f(X), Y)] - \inf_{P \in \mathcal{P}} g_S(P)$ . Under a classification setting and further mild conditions, it is asymptotically equal to the  $\text{CE}_S$  with increasing model accuracy, i.e.

$$\lim_{\text{ACC}(f) \rightarrow 1} \mathcal{U}_S(f) - \text{CE}_S(f) = 0.$$

*Proof.* **Regarding existence of upper bound**

Assuming  $\inf_{Q \in \mathcal{P}} g_S(Q) \in \mathbb{R}$ .

$$\begin{aligned}
\text{CE}_S(f) &\stackrel{\text{le } \textcolor{red}{D.1}}{=} \mathbb{E}[S(f(X), Y)] - \mathbb{E}[g_S(\mathbb{P}_{Y|f(X)})] \\
&\leq \mathbb{E}[S(f(X), Y)] - \mathbb{E}\left[\inf_{Q \in \mathcal{P}} g_S(Q)\right] \\
&= \mathbb{E}[S(f(X), Y)] - \inf_{Q \in \mathcal{P}} g_S(Q) \\
&\stackrel{\text{th } \textcolor{red}{4.3}}{=} \mathcal{U}_S(f)
\end{aligned} \tag{35}$$

**Regarding accuracy limes**

Assuming mild conditions  $g_S: \mathcal{P}_n \rightarrow \mathbb{R}$  is continuous and  $g_S(e_1) = g_S(e_2) = \dots = g_S(e_n)$ . See Figure 2 in Gneiting & Raftery [13] for an example when this is violated.  $S$  does not have to be symmetric for this to hold.

$$\begin{aligned}
& \lim_{\text{ACC}(f) \rightarrow 1} \text{CE}_S(f) - \mathcal{U}_S(f) \\
& \stackrel{\text{th 4.3}}{=} \lim_{\text{ACC}(f) \rightarrow 1} \text{CE}_S(f) - \mathbb{E}[S(f(X), Y)] + \inf_{Q \in \mathcal{P}_n} g_S(Q) \\
& \stackrel{\text{le D.1}}{=} \lim_{\text{ACC}(f) \rightarrow 1} \mathbb{E}[S(f(X), Y)] - \mathbb{E}[g_S(\mathbb{P}_{Y|f(X)})] - \mathbb{E}[S(f(X), Y)] + \inf_{Q \in \mathcal{P}_n} g_S(Q) \\
& = \lim_{\text{ACC}(f) \rightarrow 1} \inf_{Q \in \mathcal{P}_n} g_S(Q) - \mathbb{E}[g_S(\mathbb{P}_{Y|f(X)})] \\
& = \inf_{Q \in \mathcal{P}_n} g_S(Q) - \lim_{\text{ACC}(f) \rightarrow 1} \mathbb{E}[g_S(\mathbb{P}_{Y|f(X)})] \\
& = \inf_{Q \in \mathcal{P}_n} g_S(Q) - \mathbb{E}\left[g_S\left(\lim_{\text{ACC}(f) \rightarrow 1} \mathbb{P}_{Y|f(X)}\right)\right] \tag{36} \\
& \stackrel{(i)}{=} \inf_{Q \in \mathcal{P}_n} g_S(Q) - \mathbb{E}[g_S(e_{i(X)})] \\
& \stackrel{(ii)}{=} \inf_{Q \in \mathcal{P}_n} g_S(Q) - \mathbb{E}[g_S(e_1)] \\
& = \inf_{Q \in \mathcal{P}_n} g_S(Q) - g_S(e_1) \\
& \stackrel{(iii)}{=} \inf_{Q \in \mathcal{P}_n} g_S(Q) - \inf_{Q \in \mathcal{P}_n} g_S(Q) \\
& = 0
\end{aligned}$$

- (i) Perfect accuracy results in deterministic predictions, i.e.  $\forall z \in \mathcal{P}_n: \lim_{\text{ACC}(f) \rightarrow 1} \mathbb{P}_{Y|f(X)=z} \in \{e_i \mid n \geq i \in \mathbb{N}\}$ . If we define  $i: \mathcal{X} \rightarrow \mathbb{N}_{\leq n}$  as  $i(X) := \arg \max_k \lim_{\text{ACC}(f) \rightarrow 1} \mathbb{P}(Y = k \mid f(X))$ , then we have  $e_{i(X)} = \lim_{\text{ACC}(f) \rightarrow 1} \mathbb{P}_{Y|f(X)}$ .
- (ii) Follows from initial condition.
- (iii) Since  $g_S$  is concave and by the definition of  $\mathcal{P}_n$ , we have

$$\forall z \in \mathcal{P}_n \exists \lambda_1, \dots, \lambda_n \geq 0, \sum_k \lambda_k = 1: g_S(z) = g_S\left(\sum_k \lambda_k e_k\right) \geq \sum_k \lambda_k g_S(e_k) = \sum_k \lambda_k g_S(e_1) = g_S(e_1). \tag{37}$$

From this follows that  $g_S(e_1) = \inf_{Q \in \mathcal{P}_n} g_S(Q)$ .

□

## D.8 Proposition 4.5

Given injective functions  $h, h': \mathcal{P} \rightarrow \mathcal{P}$  we have

$$\mathcal{U}_S(h \circ f) - \mathcal{U}_S(f) = \text{CE}_S(h \circ f) - \text{CE}_S(f) \quad ,$$

$$\mathcal{U}_S(h \circ f) > \mathcal{U}_S(h' \circ f) \iff \text{CE}_S(h \circ f) > \text{CE}_S(h' \circ f)$$

and (assuming  $S$  is differentiable)

$$\frac{d\mathcal{U}_S(h \circ f)}{dh} = \frac{d\text{CE}_S(h \circ f)}{dh}.$$

*Proof.*

$$\begin{aligned}
& \mathcal{U}_S(h \circ f) - \mathcal{U}_S(h' \circ f) \\
& \stackrel{\text{th 4.3}}{=} \mathbb{E}[S(h \circ f(X), Y)] - \inf_{Q \in \mathcal{P}_n} g_S(Q) - \mathbb{E}[S(h' \circ f(X), Y)] + \inf_{Q \in \mathcal{P}_n} g_S(Q) \\
& = \mathbb{E}[S(h \circ f(X), Y)] - \mathbb{E}[S(h' \circ f(X), Y)] \\
& = \mathbb{E}[S(h \circ f(X), Y)] - \mathbb{E}[g_S(\mathbb{P}_{Y|f(X)})] - \mathbb{E}[S(h' \circ f(X), Y)] + \mathbb{E}[g_S(\mathbb{P}_{Y|f(X)})] \\
& \stackrel{(i)}{=} \mathbb{E}[S(h \circ f(X), Y)] - \mathbb{E}[g_S(\mathbb{P}_{Y|h \circ f(X)})] - \mathbb{E}[S(h' \circ f(X), Y)] + \mathbb{E}[g_S(\mathbb{P}_{Y|h' \circ f(X)})] \\
& \stackrel{\text{le D.1}}{=} \text{CE}_S(h \circ f) - \text{CE}_S(h' \circ f)
\end{aligned} \tag{38}$$

from which follows  $\mathcal{U}_S(h \circ f) - \mathcal{U}_S(f) = \text{CE}_S(h \circ f) - \text{CE}_S(f)$  and  $\mathcal{U}_S(h \circ f) > \mathcal{U}_S(h' \circ f) \iff \text{CE}_S(h \circ f) > \text{CE}_S(h' \circ f)$ . Further we have for differentiable  $S$

$$\begin{aligned}
& \frac{d\mathcal{U}_S(h \circ f)}{dh} \\
& \stackrel{\text{th 4.3}}{=} \frac{d\mathbb{E}[S(h \circ f(X), Y)] - \inf_{Q \in \mathcal{P}_n} g_S(Q)}{dh} \\
& = \frac{d\mathbb{E}[S(h \circ f(X), Y)]}{dh} \\
& = \frac{d\mathbb{E}[S(h \circ f(X), Y)] - \mathbb{E}[g_S(\mathbb{P}_{Y|f(X)})]}{dh} \\
& \stackrel{(i)}{=} \frac{d\mathbb{E}[S(h \circ f(X), Y)] - \mathbb{E}[g_S(\mathbb{P}_{Y|h \circ f(X)})]}{dh} \\
& \stackrel{\text{le D.1}}{=} \frac{d\text{CE}_S(h \circ f)}{dh}
\end{aligned} \tag{39}$$

(i) Since  $h$  is injective, we have  $\forall z \in \mathcal{P}_n$ :  $\{x \in \mathcal{X} \mid f(x) = z\} = \{x \in \mathcal{X} \mid h \circ f(x) = h(z)\}$  and  $\{(x, y) \in \mathcal{X} \times \mathcal{Y} \mid f(x) = z\} = \{(x, y) \in \mathcal{X} \times \mathcal{Y} \mid h \circ f(x) = h(z)\}$ . Consequently  $\mathbb{P}(Y \mid f(X) = z) = \frac{\mathbb{P}(Y, f(X)=z)}{\mathbb{P}(f(X)=z)} = \frac{\mathbb{P}(Y, h \circ f(X)=h(z))}{\mathbb{P}(h \circ f(X)=h(z))} = \mathbb{P}(Y \mid h \circ f(X) = h(z))$ .  $\square$

## E Recalibration transformations

### E.1 calibrated and accuracy-preserving

The binary case is directly given in the multi-class case, but if we only have a scalar output, which is common for binary classification, deriving the transformation is not that trivial. Consequently, we handle this case separately.

We will also make use of the following lemma.

**Lemma E.1.** *For random variables  $Y$  and  $X$ , we have*

$$\mathbb{P}(Y \mid \mathbb{P}(Y \mid X)) = \mathbb{P}(Y \mid X).$$

*Proof.* Proof directly follows from Proposition 1 in Vaicenavicius et al. [53] with  $h \equiv \text{id}$ .  $\square$

#### E.1.1 Binary case (scalar output)

Assume we are given  $f: \mathcal{X} \rightarrow [0, 1]$ .

Define  $t^f: [0, 1] \rightarrow [0, 1]$  as

$$t^f(p) = \begin{cases} \mathbb{P}(Y = 1 \mid f(X) < 0.5) & , \text{ if } p < 0.5 \\ \mathbb{P}(Y = 1 \mid f(X) \geq 0.5) & , \text{ else} \end{cases} \tag{40}$$

The first line has as unbiased estimator the precision (or positive predictive value), the second the false omission rate.

This gives

$$\begin{aligned}\mathbb{P}(Y = 1 \mid t^f \circ f(X)) &= \begin{cases} \mathbb{P}(Y = 1 \mid \mathbb{P}(Y = 1 \mid f(X) < 0.5)) & , \text{ if } f(X) < 0.5 \\ \mathbb{P}(Y = 1 \mid \mathbb{P}(Y = 1 \mid f(X) \geq 0.5)) & , \text{ else} \end{cases} \\ &= \begin{cases} \mathbb{P}(Y = 1 \mid f(X) < 0.5) & , \text{ if } f(X) < 0.5 \\ \mathbb{P}(Y = 1 \mid f(X) \geq 0.5) & , \text{ else} \end{cases} \\ &= t^f \circ f(X)\end{aligned}\tag{41}$$

i.e.  $t^f \circ f$  is calibrated. Further, if  $\mathbb{P}(Y = 1 \mid f(X) < 0.5) < \mathbb{P}(Y = 1 \mid f(X) \geq 0.5)$ , then  $t^f \circ f$  has the same accuracy as  $f$ . This can be assumed as given for any meaningful classifier. The reduction in sharpness directly follows from the analog proof in the multi-class case.

### E.1.2 Multi-class case (vector output)

Let  $r: \mathcal{P}_n \rightarrow A$  with  $A = \{a \in \{0, 1\}^K \mid \sum_k a_k = 1\}$  be defined as  $r(p) := e_{\arg \max_k p_k}$ . In words,  $r$  returns a vector of only zeros except a '1' at index  $\arg \max_k p_k$  for input  $p \in \mathcal{P}_n$ .

Define  $t^f: \mathcal{P}_n \rightarrow \mathcal{P}_n$  as

$$t^f(p) = \mathbb{P}(Y \mid r \circ f(X) = r(p))\tag{42}$$

(For easier notation, we say  $\mathbb{P}(Y) \in \mathcal{P}_n$ )

Given a dataset  $\{(X_1, Y_1), \dots, (X_m, Y_m)\}$ , an unbiased estimator of  $\mathbb{P}(Y \mid r \circ f(X) = a) \forall a \in A$  is  $P_a = \frac{1}{|I_a|} \sum_{i \in I_a} e_{Y_i}$  with  $I_a = \{i \in \{1, \dots, m\} \mid r \circ f(X_i) = a\}$ . And since  $|A| = n$ , estimation is also feasible for higher number of classes.

We also have

$$\begin{aligned}\mathbb{P}(Y \mid t^f \circ f(X)) &= \mathbb{P}(Y \mid \mathbb{P}(Y \mid r \circ f(X) = r \circ f(X))) \\ &= \mathbb{P}(Y \mid \mathbb{P}(Y \mid r \circ f(X))) \\ &= \mathbb{P}(Y \mid r \circ f(X)) \\ &= t^f \circ f(X)\end{aligned}\tag{43}$$

Consequently,  $t^f \circ f$  is calibrated.

If  $\arg \max_k f_k(X) = \arg \max_k \mathbb{P}(Y = k \mid \arg \max_k f_k(X))$ , then  $\arg \max_k f_k(X) = \arg \max_k \mathbb{P}(Y = k \mid r \circ f(X)) = \arg \max_k \mathbb{P}(Y = k \mid r \circ f(X) = r \circ f(X)) = \arg \max_k t_k^f \circ f(X)$ , i.e.  $t^f$  is accuracy preserving. Recall that  $\arg \max_k f_k(X)$  is the predicted top-label, making  $\arg \max_k \mathbb{P}(Y = k \mid \arg \max_k f_k(X))$  the most likely outcome given a predicted top-label. So, we can restate the above as:  $t^f$  is accuracy preserving if for every predicted top-label the most likely outcome is that label. This should hold in every meaningful practical setting, or else  $t^f$  might as well improve the accuracy.

$t^f \circ f$  has lower sharpness as  $f$  w.r.t. a proper score  $S$ . This is a special case of the following proposition, where we write  $\text{SHARP}_S(f)$  as the sharpness of model  $f$  given by the sharpness term in Lemma 4.1 of a proper score  $S$ .

**Proposition E.2.** Assume Lemma 4.1 holds given a proper score  $S$ . For a function  $m: \mathcal{P}_n \rightarrow \mathcal{P}_n$  and model  $f: \mathcal{X} \rightarrow \mathcal{P}_n$ , we have

$$\text{SHARP}_S(f) \geq \text{SHARP}_S(m \circ f).$$

*Proof.* Since we assumed Lemma 4.1 holds, the conditions for Fubini's theorem are met. We will use:

$$\begin{aligned}
& \text{SHARP}_S(f) \\
& \stackrel{\text{le 4.1}}{=} \mathbb{E} [d_S(\mathbb{P}_Y, \mathbb{P}_{Y|f(X)})] \\
& \stackrel{\text{def C.6}}{=} \mathbb{E} [s_S(\mathbb{P}_Y, \mathbb{P}_{Y|f(X)})] - \mathbb{E} [g_S(\mathbb{P}_{Y|f(X)})] \\
& \stackrel{\text{def C.5}}{=} \int \int S(\mathbb{P}_Y, y) d\mathbb{P}_{Y|f(X)=z}(y) d\mathbb{P}_{f(X)}(z) - \mathbb{E} [g_S(\mathbb{P}_{Y|f(X)})] \\
& = \int S(\mathbb{P}_Y, y) d\mathbb{P}_{Y,f(X)}(y, z) - \mathbb{E} [g_S(\mathbb{P}_{Y|f(X)})] \\
& \stackrel{\text{Fubini}}{=} \int S(\mathbb{P}_Y, y) \int d\mathbb{P}_{f(X)|Y=y}(z) d\mathbb{P}_Y(y) - \mathbb{E} [g_S(\mathbb{P}_{Y|f(X)})] \\
& = \int S(\mathbb{P}_Y, y) d\mathbb{P}_Y(y) - \mathbb{E} [g_S(\mathbb{P}_{Y|f(X)})] \\
& \stackrel{\text{def C.6}}{=} g_S(\mathbb{P}_Y) - \mathbb{E} [g_S(\mathbb{P}_{Y|f(X)})]
\end{aligned} \tag{44}$$

Now, we can show

$$\begin{aligned}
& \text{SHARP}_S(f) \\
& \stackrel{\text{eq 44}}{=} g_S(\mathbb{P}_Y) - \mathbb{E} [g_S(\mathbb{P}_{Y|f(X)})] \\
& = g_S(\mathbb{P}_Y) - \mathbb{E}_{m \circ f(X)} [\mathbb{E}_{f(X)} [g_S(\mathbb{P}_{Y|f(X)}) \mid m \circ f(X)]] \\
& \stackrel{\text{Jensen}}{\geq} g_S(\mathbb{P}_Y) - \mathbb{E}_{m \circ f(X)} [g_S(\mathbb{E}_{f(X)} [\mathbb{P}_{Y|f(X)} \mid m \circ f(X)])] \\
& = g_S(\mathbb{P}_Y) - \mathbb{E}_{m \circ f(X)} [g_S(\mathbb{E}_{f(X)} [\mathbb{E}[e_Y \mid f(X)] \mid m \circ f(X)])] \\
& = g_S(\mathbb{P}_Y) - \mathbb{E}_{m \circ f(X)} [g_S(\mathbb{E}[e_Y \mid m \circ f(X)])] \\
& = g_S(\mathbb{P}_Y) - \mathbb{E}_{m \circ f(X)} [g_S(\mathbb{P}_{Y|m \circ f(X)})] \\
& \stackrel{\text{eq 44}}{=} \text{SHARP}_S(m \circ f)
\end{aligned} \tag{45}$$

□

If the underlying score is the log score, then the sharpness is the mutual information between predictions and target random variable. Consequently, we can interpret the sharpness as generalized mutual information. This gives the proposition the following intuitive meaning: There exists no function, that can transform a random variable in a way such that the mutual information with another random variable is increased. Or, in other words, we cannot add 'information' to a random variable by transforming it in a deterministic way.

## F Proper U-scores

In this section we introduce a generalization of proper scores. Based on U-statistics, we define proper U-scores. This allows us to naturally extend the definition of proper calibration errors to be based on proper U-scores instead of just proper scores. Consequently, we can cover more calibration errors with desired properties. For example, we can show that the squared KCE [57] is a proper calibration error based on a U-score (but not on a conventional score). The squared KCE has an unbiased estimator, thus, this extension of the definition of proper calibration errors has substantial practical value.

### F.1 Background

Let  $X_1, \dots, X_n$  be  $n$  iid random variables and  $\phi(x_1, \dots, x_r)$  a function with  $r \leq n$ . Let  $\mathbf{P} = \{a \in \{1, \dots, n\}^r \mid a_1 < \dots < a_r\}$  be the set of  $r$  sized ordered permutations out of  $n$ , i.e.  $|\mathbf{P}| = \binom{n}{r}$ .

Then  $U = \frac{1}{|\mathbf{P}|} \sum_{a \in \mathbf{P}} \phi(X_{a_1}, \dots, X_{a_r})$  is a unbiased minimum-variance estimator (UMVE) of  $\mathbb{E}[\phi(X_1, \dots, X_r)]$  and called U-statistic [21].

## F.2 Contributions

Assume we have two measure spaces  $(\mathcal{X}, \mathcal{F}_X)$  and  $(\mathcal{Y}, \mathcal{F}_Y)$ , and corresponding  $\mathcal{P}_X$  and  $\mathcal{P}_Y$  sets of possible probability measures. We want to score a conditional distribution  $P: \mathcal{X} \rightarrow \mathcal{P}_Y$  given another conditional distribution  $Q: \mathcal{X} \rightarrow \mathcal{P}_Y$ .

**Definition F.1.** A U-scoring rule  $S$  is a function of the form

$$S: \mathcal{P}_Y^r \times \mathcal{Y}^r \rightarrow \overline{\mathbb{R}}$$

with  $r \in \mathbb{N}$  and  $\overline{\mathbb{R}} := \mathbb{R} \cup \{-\infty, \infty\}$ .

It takes  $r$  predictions and events and returns a score. For  $r = 1$ , U-scoring rules are scoring rules in the common definition.

**Definition F.2.** A U-scoring function  $s_S$  based on a U-scoring rule  $S$  is defined as

$$\begin{aligned} s_S: \mathcal{P}_Y^{2r} &\rightarrow \overline{\mathbb{R}} \\ (P_1, \dots, P_r, Q_1, \dots, Q_r) &\mapsto \int_{\mathcal{Y}^r} S(P_1, \dots, P_r, y_1, \dots, y_r) d(Q_1 \times \dots \times Q_r)(y) \end{aligned} \quad (46)$$

For  $r = 1$ , U-scoring functions are scoring functions in the common definition. If  $Q_1, \dots, Q_r$  are the distributions of  $Y_1, \dots, Y_r$  we can also write  $s(P_1, \dots, P_r, Q_1, \dots, Q_r) = \mathbb{E}[S(P_1, \dots, P_r, Y_1, \dots, Y_r)]$ .

**Definition F.3.** A U-scoring function  $s_S$  (and its U-scoring rule  $S$ ) is defined to be **proper** if and only if

$$\begin{aligned} \forall \mathbb{P} \in \mathcal{P}_X, \quad X_1, \dots, X_r \stackrel{iid}{\sim} \mathbb{P}, \quad \forall P, Q: \mathcal{X} \rightarrow \mathcal{P}_Y: \\ \mathbb{E} s_S(P(X_1), \dots, P(X_r), Q(X_1), \dots, Q(X_r)) \\ \geq \mathbb{E} s_S(Q(X_1), \dots, Q(X_r), Q(X_1), \dots, Q(X_r)) \end{aligned} \quad (47)$$

and **strictly proper** if and only if additionally

$$\begin{aligned} \forall \mathbb{P} \in \mathcal{P}_X, \quad X_1, \dots, X_r \stackrel{iid}{\sim} \mathbb{P}, \quad \forall P, Q: \mathcal{X} \rightarrow \mathcal{P}_Y: \\ Q \neq P \\ \implies \mathbb{E} s_S(P(X_1), \dots, P(X_r), Q(X_1), \dots, Q(X_r)) \\ > \mathbb{E} s_S(Q(P_1), \dots, Q(P_r), Q(P_1), \dots, Q(P_r)) \end{aligned} \quad (48)$$

In words,  $s_S$  (or  $S$ ) is proper if comparing  $Q$  with itself gives the best expected value, and strictly proper if no other  $P \neq Q$  can achieve this value. The U-statistic of a proper  $s_S$  is a UMVE [21]. For  $r = 1$ , proper U-scores are identical to proper scores if  $\mathcal{P}_X$  is sufficiently large. This holds since for function  $f: \mathcal{X} \rightarrow \mathbb{R}$  and appropriate  $\mathcal{P}_X$  we have:  $(\forall \mu \in \mathcal{P}_X: \int f d\mu = 0) \iff f = 0$ .

**Definition F.4.**  $g(Q_1, \dots, Q_r) = s(Q_1, \dots, Q_r, Q_1, \dots, Q_r)$  is called the (generalized or associated) entropy.

**Definition F.5.** Given a proper U-score  $S$ , the associated **U-divergence**  $d$  is defined as

$$\begin{aligned} d_S: \mathcal{P}_Y^{2r} &\rightarrow \overline{\mathbb{R}}_{\geq 0} \\ (P_1, \dots, P_r, Q_1, \dots, Q_r) &\mapsto s_S(P_1, \dots, P_r, Q_1, \dots, Q_r) - g_S(Q_1, \dots, Q_r). \end{aligned} \quad (49)$$

If  $S$  is a strictly proper U-score,  $Q_1, \dots, Q_r$  iid and  $P_1, \dots, P_r$  iid, then  $\mathbb{E} d_S$  is zero if and only if  $\forall i \in \{1, \dots, r\}: Q_i \stackrel{a.s.}{=} P_i$ . This follows directly by setting  $P_i = P(X_i)$  and  $Q_i = Q(X_i)$  in equation (48).

Assuming  $P_1, \dots, P_r$  are random variables and  $\mathbb{P}_{Y|P_1}, \dots, \mathbb{P}_{Y|P_r} \in \mathcal{P}_Y$  are the conditional distribution of independent random variables  $Y_1, \dots, Y_r \sim$

$\mathbb{P}_Y$ , where each  $Y_i$  only depends on  $P_i$ . Under the condition that  $g_S(\mathbb{P}_Y, \dots, \mathbb{P}_Y), \mathbb{E}[g_S(\mathbb{P}_{Y|P_1}, \dots, \mathbb{P}_{Y|P_r})], \mathbb{E}[|S(P_1, \dots, P_r, Y_1, \dots, Y_r)|], \mathbb{E}[|S(\mathbb{P}_Y, \dots, \mathbb{P}_Y, Y_1, \dots, Y_r)|] < \infty$ , we have the decomposition

$$\begin{aligned} & \mathbb{E}[S(P_1, \dots, P_r, Y_1, \dots, Y_r)] \\ &= \mathbb{E}[s_S(P_1, \dots, P_r, \mathbb{P}_{Y|P_1}, \dots, \mathbb{P}_{Y|P_r})] \\ &= g_S(\mathbb{P}_Y, \dots, \mathbb{P}_Y) \\ & \quad + \mathbb{E}[d_S(P_1, \dots, P_r, \mathbb{P}_{Y|P_1}, \dots, \mathbb{P}_{Y|P_r})] \\ & \quad - \mathbb{E}[d_S(\mathbb{P}_Y, \dots, \mathbb{P}_Y, \mathbb{P}_{Y|P_1}, \dots, \mathbb{P}_{Y|P_r})]. \end{aligned} \tag{50}$$

Proof is identical to proof of Lemma 4.1. The first term is the generalized entropy, the second the calibration, and the third the sharpness term.

Thus, every proper U-score  $S$  induces a proper calibration error defined as

$$\begin{aligned} & \text{CE}_S(f) \\ &= \mathbb{E}[d_S(f(X_1), \dots, f(X_r), \mathbb{P}_{Y|f(X_1)}, \dots, \mathbb{P}_{Y|f(X_r)})] \\ & \text{with iid } X_1, \dots, X_r. \end{aligned} \tag{51}$$

Since proper U-scores are identical to proper scores for  $r = 1$ , this definition of proper calibration errors does not contradict definitions or findings in the main paper. For any strictly proper U-score  $S$ ,  $\text{CE}_S$  of model  $f$  is zero if and only if  $f$  is calibrated. This directly follows from the property of the U-divergence. But, it should be noted that we cannot assume every property holding for  $r = 1$  also holds for  $r \in \mathbb{N}$ . Investigating this can be seen as potential future work.

An example with  $r = 2$ :

For positive definite kernel matrix  $k$ , define

$$S(P_1, P_2, y_1, y_2) = (P_1 - e_{y_1})^\top k(P_1, P_2) (P_2 - e_{y_2}) \tag{52}$$

which gives

$$g_S(Q_1, Q_2) = 0 \tag{53}$$

and

$$\begin{aligned} & d_S(P_1, P_2, Q_1, Q_2) \\ &= (P_1 - Q_1)^\top k(P_1, P_2) (P_2 - Q_2) \end{aligned} \tag{54}$$

and the calibration term

$$\begin{aligned} & \mathbb{E}[d_S(P_1, P_2, \mathbb{P}_{Y|P_1}, \mathbb{P}_{Y|P_2})] \\ &= \mathbb{E}[(P_1 - \mathbb{P}_{Y|P_1})^\top k(P_1, P_2) (P_2 - \mathbb{P}_{Y|P_2})] \end{aligned} \tag{55}$$

If  $P_1, P_2 \sim \mathbb{P}_{f(X)}$ , then this is the squared KCE (SKCE) of  $f$  [57]. Widmann et al. [57] proved that the SKCE is zero if and only if  $f$  is calibrated, and  $f$  is calibrated if  $f(X) = \mathbb{P}_{Y|f(X)}$ , which includes  $f(X) = \mathbb{P}_{Y|X}$ . Consequently, the associated divergence is not uniquely minimized by the target distribution. Thus, the score of the SKCE is proper but not strictly proper.

Interestingly,  $\mathbb{E}[d_S(\mathbb{P}_Y, \mathbb{P}_Y, \mathbb{P}_{Y|f(X)}, \mathbb{P}_{Y|f(X')})] = 0$  for  $X, X'$  iid, i.e. the score of the SKCE only measures calibration and ignores sharpness. This fact is consistent with all previous findings of the SKCE.

## G Extended experiments

In this section, we provide further details of the experimental setup and report additional results. This includes results in the squared space, where the upper bound estimator is minimum-variance unbiased. Further, we present results on the Friedman 1 regression problem, which is also used by Widmann et al. [58].

### G.1 Details on the ECE estimator simulation in Figure 2

We simulate model predictions of a 100 class classification problem with validation set size of 10'000 and test set size of 10'000. For this, we sample the model predictions from a multivariate logistic normal distribution [1], since it is a lot more flexible in its covariance matrix than a dirichlet distribution. This brings the samples closer to real-world model predictions. We sample the covariance matrix from an inverse-wishart distribution with a scale matrix of  $I_{100}/0.01$ . The scale matrix was tempered in such a way to receive model predictions with  $\approx 87.6\%$  classification accuracy. We will explain the label sampling in the following. Again, we aimed for realistic values.

Now, we want a model-target relation of which we know that the model is calibrated. For this, we iterate over every model prediction and use each model prediction as a categorical distribution from which we sample the label. Consequently, each model prediction is the ground truth distribution of each label. This gives us calibrated prediction-target pairs, which we used to estimate the ECE of the perfectly calibrated 'model' in Figure 2 (blue line). Next, to gradually decrease the level of calibration, we scale the predictions via different temperatures in the logit space. Thus, we know that the 'model' of mediocre calibration (orange line) is worse than the 'model' of perfect calibration, and better than the 'model' of bad calibration (green line).

### G.2 Details on experimental setup of Section 5

The experiments are conducted across several model-dataset combinations, for which logit sets are openly accessible<sup>5</sup> [29, 45]. This includes the models LeNet 5 [32], ResNet 50 (with and without pretraining), ResNet 50 NTS, ResNet 101 (with and without pretraining) ResNet 110, ResNet 110 SD, ResNet 152, ResNet 152 SD [20], Wide ResNet 32 [62], DenseNet 40, DenseNet 161 [22], and PNASNet5 Large [33] and the datasets CIFAR10, CIFAR100 [27], and ImageNet [9]. We did not conduct model training by ourselves, and refer to [29] and [45] for further details. Validation and test set splits are predefined in every logit set. We include TS, ETS, and DIAG as injective recalibration methods. For optimization of TS and ETS, we modified the available implementation of Zhang et al. [63] and used the validation set as calibration set. For DIAG, we used the exact implementation of Rahimi et al. [45].

For every dataset we investigate ten ticks of different (sampled) test set sizes. The ticks are determined to be equally apart in the  $\log_2$  space. The minimum is always 100 and the maximum the full available test set size. We use repeated sampling with subsequent averaging to counteract the increased estimation variance for low test set sizes. The estimated standard errors are also shown in the plots, but they are often barely visible. The number of samples in each tick is along the following:

- Tick 1 ( $n = 100$ ): 20000
- Tick 2: 15842
- Tick 3: 12168
- Tick 4: 8978
- Tick 5: 6272
- Tick 6: 4050
- Tick 7: 2312
- Tick 8: 1058
- Tick 9: 288
- Tick 10 (full test set): 2

---

<sup>5</sup>[https://github.com/markus93/NN\\_calibration/](https://github.com/markus93/NN_calibration/) and <https://github.com/AmirooR/IntraOrderPreservingCalibration>

The seeds for the sampling of the experiments have been saved. Since we choose the amount of samples such that the estimation standard error is low, we expect similar results no matter the chosen seed.

All experiments have been computed on a machine with 1007 GB RAM and two Intel(R) Xeon(R) Gold 6230R CPU @ 2.10GHz.

### G.3 Estimated model calibration

Calibration errors according to different estimators and for different model-dataset combinations are shown in figure 5 and first row of figure 7 (in squared space). These experiments confirm that the proposed upper bound is stable across a multitude of settings.

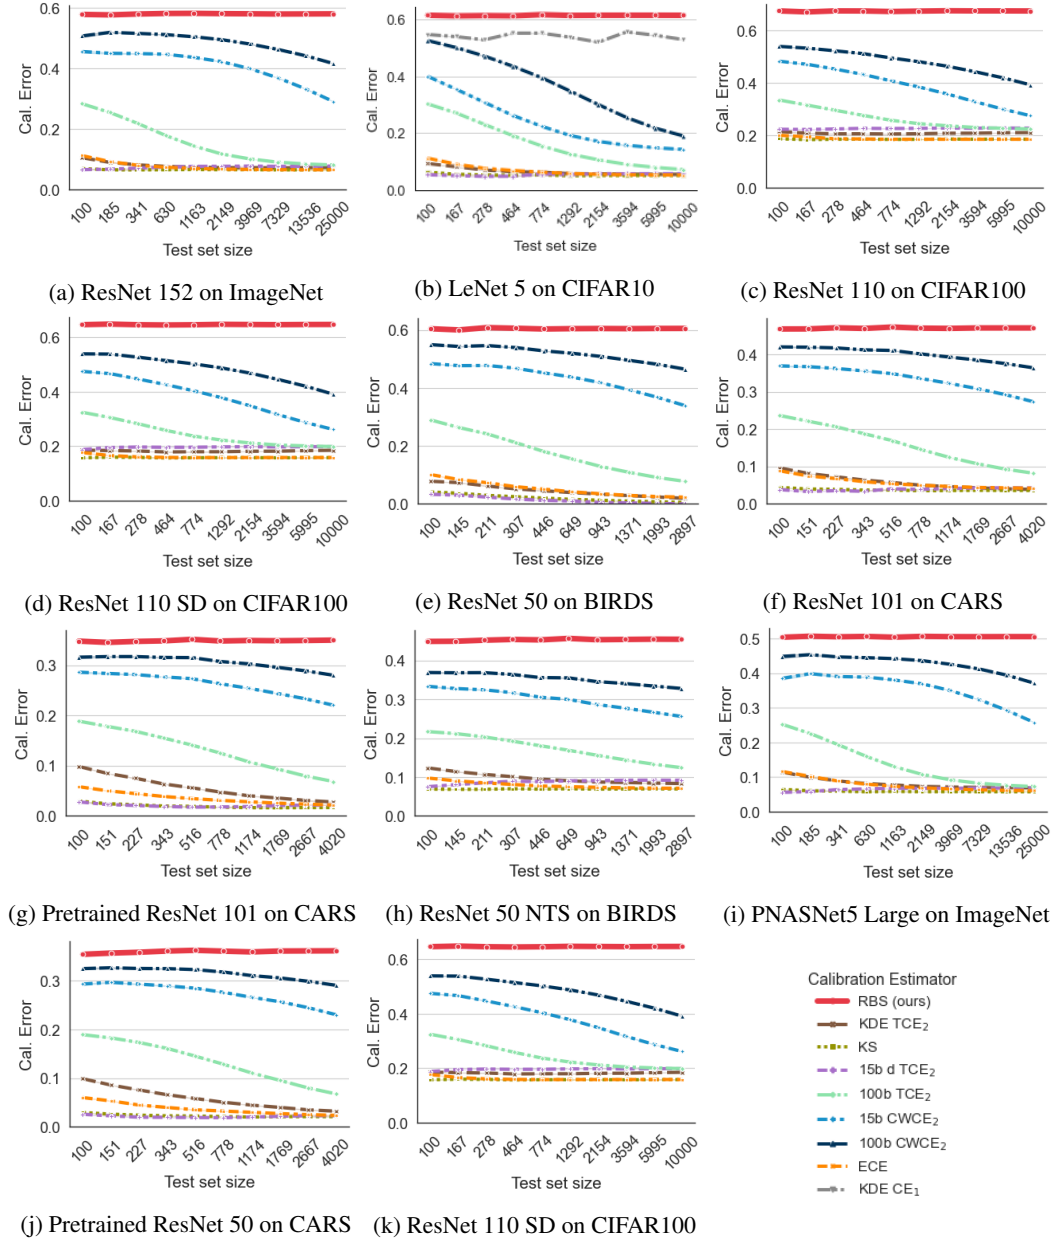

Figure 5: Different calibration error estimates versus the test set size. The red line corresponds to the square root of the Brier score which is an upper bound of  $CE_2$ . The other estimators are lower bounds.

## G.4 Recalibration improvement

In the main text we investigated recalibration improvement of common estimators for the calibration error and compared their reliability to RBS. According to Proposition 4.5 and since RBS is asymptotically unbiased and consistent, it can be regarded as a reliable approximation of the real improvement of the recalibration methods. However, if we move to the squared space, our proposed upper bound is even provably reliable since it has a minimum-variance unbiased estimator. This motivates further experiments comparing existing calibration errors in the squared space, which we describe in the following. Here, we first report additional results comparing common estimators to RBS; we then report results in the squared space. We start with a formal description of the problem and experimental setup.

Let  $D$  be a sampled subset of the full test set. Let  $f$  be the underlying model and  $h$  an optimized recalibration method. Let  $e$  be an calibration error estimator taking a dataset and a model as inputs. The recalibration improvement according to estimator  $e$  is estimated via  $e(D, f) - e(D, h \circ f)$ .

**Recalibration improvement of common estimators** We compute the recalibration improvement of common estimators on several test set samples of a given size and plot the average of these on the y-axis. We extend the results reported in the main text by covering additional datasets, models and architectures. These extended experiments confirm the findings reported in the main text, namely that only RBS reliably quantifies the improvement in calibration error after recalibration (Fig. 6; standard errors are shown).

**Recalibration improvement in the squared space** The recalibration improvement in the squared space according to estimator  $e$  is estimated via  $(e(D, f))^2 - (e(D, h \circ f))^2$ . The results are depicted in Figure 7. For CIFAR10, we also included the KDE estimator for  $CE_2^2$  according to [43]. Only the Brier score (square of RBS) yields provably unbiased estimates of the true recalibration improvement w.r.t.  $CE_2^2$ . In contrast to our approach, all other estimators are sensitive to test set size and/or substantially underestimate the true recalibration improvement in squared space.

For larger subsets of the CIFAR100 test set, the automatic bandwidth optimization for KDE  $CE_2$  does not return a valid bandwidth. These cases are omitted from Figure 7b and 7e. We also omitted KDE  $CE_1$  as it shows similar behaviour as KDE  $CE_2$  but is shifted substantially towards the negative like in the CIFAR10 case (Fig. 7d).

## G.5 Variance regression

In the following, we give more details on the variance regression experiment in the main paper, but also add further results of the Friedman 1 regression problem.

In all following scenarios, we are interested in the effect of recalibration towards predictive uncertainty. For this, we use Platt scaling ( $x \rightarrow wx + b$  with parameters  $w, b \in \mathbb{R}$ ) of the variance output and optimize  $w$  and  $b$  with the L-BFGS optimizer on the validation set. Further, since Platt scaling is injective, we apply Theorem 4.3 and Proposition 4.5 to treat the DSS score as an calibration error for recalibration. Consequently, optimizing Platt scaling with the DSS score is equivalent to optimizing the associated calibration error.

We will use this recalibration procedure in each iteration during model training, but without modifying the model for the next training step.

Widmann et al. [58] used the MSE as training objective, while we use the DSS, as it is a natural extension of the MSE to variance regression.

We repeat each experiment with five distinct seeds and aggregate the results, giving the characteristic error bands in each figure.

### G.5.1 UCI dataset *Residential Building*

The Residential Building dataset consists of 107 features and 372 data instances. To have similar conditions as the Friedman 1 regression problem in the next section, we split the dataset into a training, validation, and test set with sizes 100, 100, and 173. We use a fully-connected mixture density network as Widmann et al. [58], except we are also using an output node for the variance

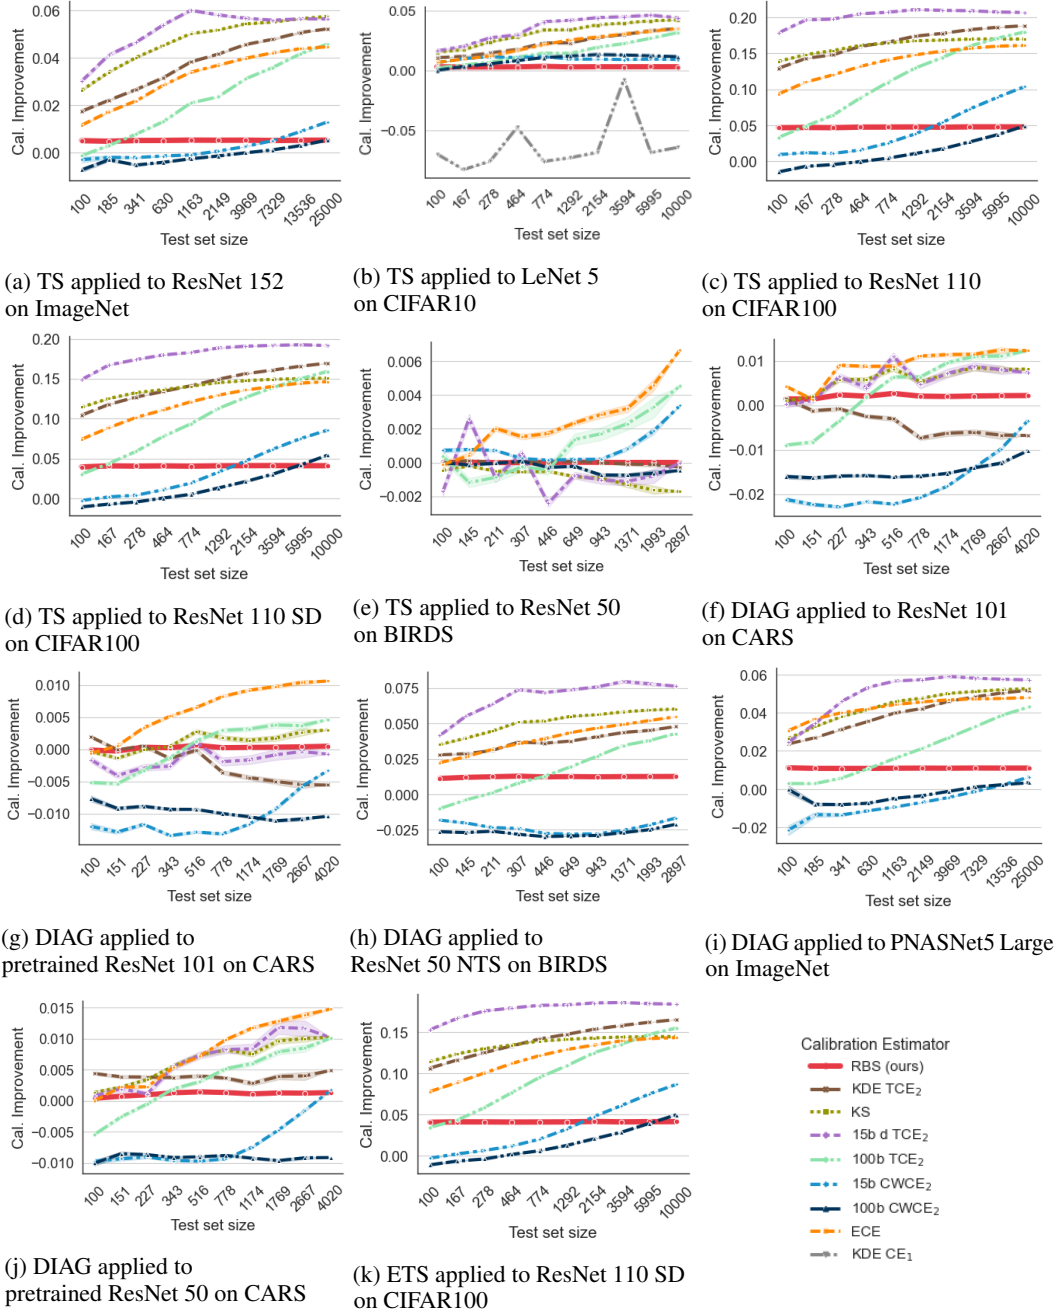

Figure 6: Different calibration improvement estimates versus the test set size. The red line corresponds to the square root of the Brier score.

prediction, and reduce its size for a more stable training. Specifically, it consists of 107 input nodes, 200 hidden nodes, and 2 output nodes. Similar to Widmann et al. [58], we use Adam as model optimizer with default parameters (0.001 learning rate, 0.9 first momentum decay, 0.999 second momentum decay).

We show similar results as in Figure 4 but with aggregations from different runs with distinct seeds. The evaluations are depicted in 8 and repeat the findings in the main paper.

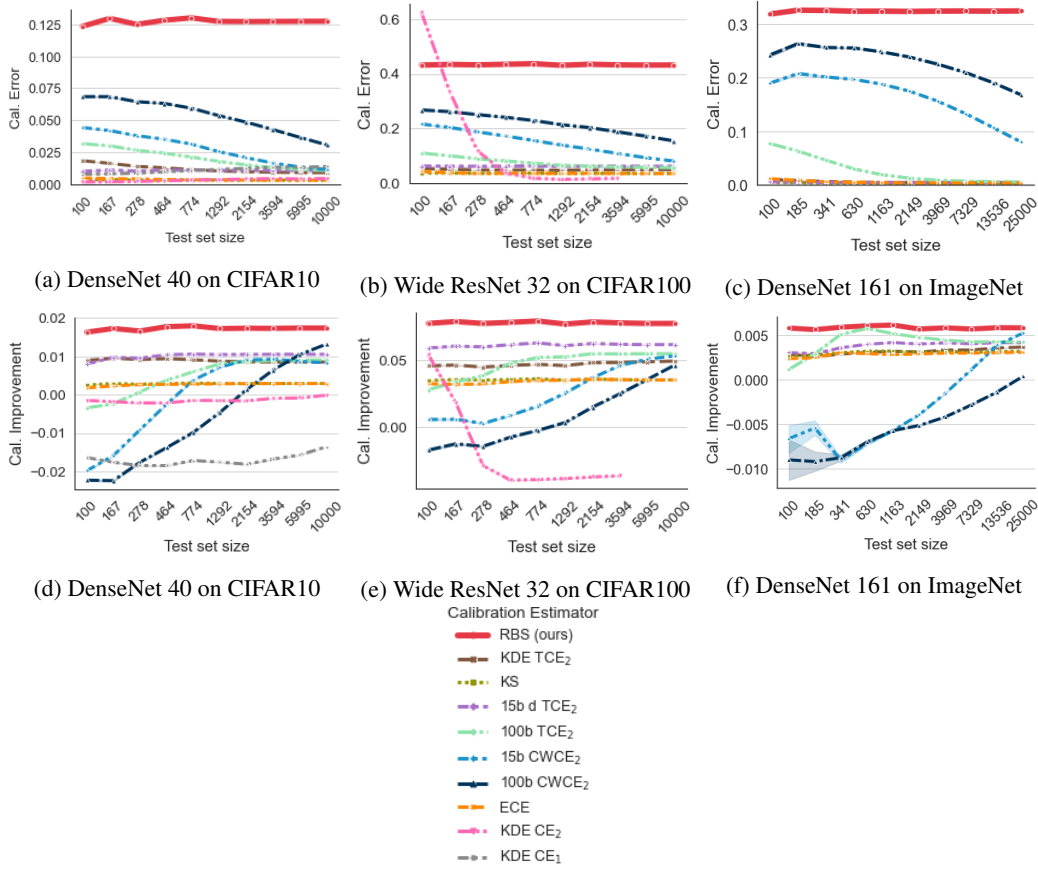

Figure 7: **First row:** Different squared calibration error estimates versus the test set size. The red line corresponds to the Brier score which is an upper bound of  $CE_2^2$ . The other errors are lower bounds. **Second row:** Estimated improvements in the squared space of injective recalibration methods in different settings. Our approach captures the true improvement w.r.t.  $CE_2^2$  in an unbiased manner.

### G.5.2 Friedman 1

The Friedman 1 regression problem consists of ten feature variables but only five influence the target variable [11]. The target variable is given by

$$Y = 10 \sin(\pi X_1 X_2) + 20(X_3 - 0.5)^2 + 10X_4 + 5X_5 + \epsilon \quad (56)$$

with input  $X_i \sim U(0, 1)$  independently uniformly distributed for  $i = 1, \dots, 10$ , and noise  $\epsilon \sim \mathcal{N}(0, 1)$ . It was used lately to investigate model calibration in the regression case [58]. We slightly modify the Friedman 1 regression problem to have varying variance depending on the sixth feature variable, i.e.  $\epsilon \sim \mathcal{N}(0, 0.5 + X_6)$ . This makes it non-trivial to give an estimate of the predictive uncertainty in the form of the predicted variance. We sample a training, validation, and test set, each of size 100 similar to Widmann et al. [58].

We use the same fully-connected mixture density network as Widmann et al. [58], except we are also using an output node for the variance prediction. Further, we use the same training details as Widmann et al. [58]. We repeat each run three times and aggregate the results.

We again compare DSS, SKCE, and average predicted variance throughout model training with and without recalibration. We depict the performance according to various errors during model training in Figure 9. As can be seen, recalibration adjusts overfitting of the predicted variance. Consequently, the uncertainty communication of the model is improved. Further, the SKCE seems to be less influenced by the variance calibration and more so by the mean calibration. This is a significant drawback when uncertainty communication is done via the predicted variance.

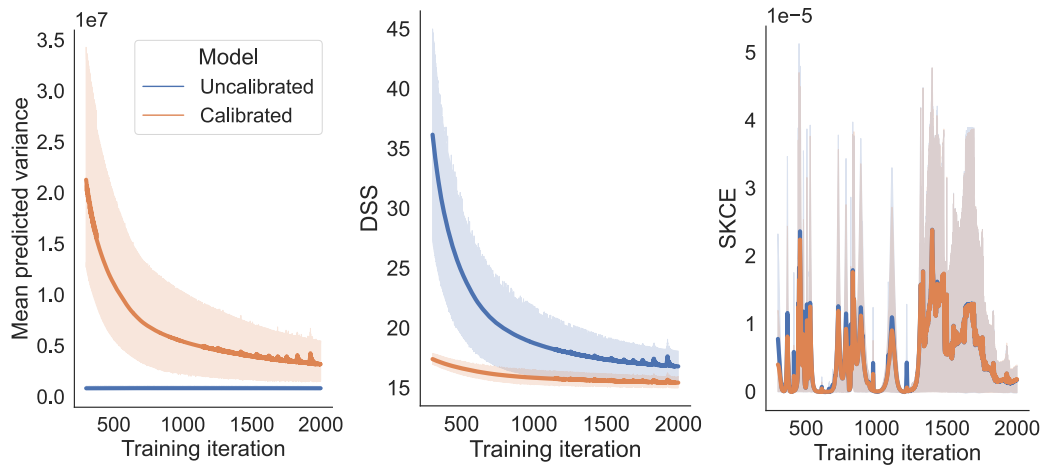

Figure 8: **Left:** Average predicted variance throughout model training before and after recalibration. Initially, due to a bad fit, recalibration adjusts the variance accordingly for better communicated uncertainty. Once the model fit improves, the predicted variance requires less adjustment due to less uncertainty in each prediction. **Middle:** DSS communicates reasonably changes in the variance due to recalibration. **Right:** SKCE fails to capture the variance trend and behaves erratically.

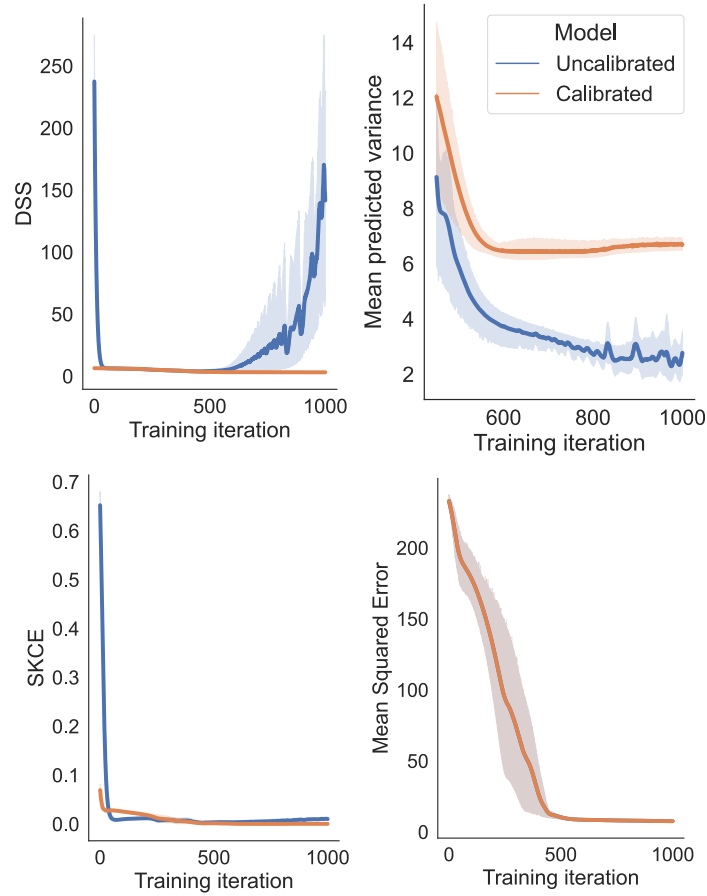

Figure 9: **Upper left:** DSS shows that overfitting occurs at some point during training. Recalibration successfully adjusts this overfit. This indicates that most of the overfit is regarding variance and not mean prediction. **Upper right:** Average predicted variance starting from the point of overfitting. Recalibration adjusts the steadily decreasing predicted variance to a constant level. **Lower left:** SKCE signals improved calibration at the start of training but remains relatively unchanged by the variance overfit. **Lower right:** The MSE curve confirms that the predicted mean is not overfitted and suggests the SKCE is more sensitive to the calibration of the mean than the calibration of the variance estimate. Our recalibration does not influence the predicted mean, thus we omit the recalibrated model from this subfigure.

## References

- [1] Aitchison, J. and Shen, S. M. Logistic-normal distributions: Some properties and uses. *Biometrika*, 67(2): 261–272, 1980. ISSN 00063444. URL <http://www.jstor.org/stable/2335470>
- [2] Bishop, C. M. Mixture density networks. 1994.
- [3] Brier, G. W. Verification of forecasts expressed in terms of probability. *Monthly Weather Review*, 78(1): 1 – 3, 1950. doi: 10.1175/1520-0493(1950)078<0001:VOFEIT>2.0.CO;2. URL [https://journals.ametsoc.org/view/journals/mwre/78/1/1520-0493\\_1950\\_078\\_0001\\_vofeit\\_2\\_0\\_co\\_2.xml](https://journals.ametsoc.org/view/journals/mwre/78/1/1520-0493_1950_078_0001_vofeit_2_0_co_2.xml)
- [4] Bröcker, J. Reliability, sufficiency, and the decomposition of proper scores. *Quarterly Journal of the Royal Meteorological Society*, 135(643):1512–1519, Jul 2009. ISSN 1477-870X. doi: 10.1002/qj.456. URL <http://dx.doi.org/10.1002/qj.456>
- [5] Capiński, M. and Kopp, P. E. *Measure, integral and probability*, volume 14. Springer, 2004.
- [6] Chung, Y., Neiswanger, W., Char, I., and Schneider, J. Beyond pinball loss: Quantile methods for calibrated uncertainty quantification, 2021.
- [7] Dawid, A. P. The well-calibrated bayesian. *Journal of the American Statistical Association*, 77(379): 605–610, 1982. doi: 10.1080/01621459.1982.10477856. URL <https://www.tandfonline.com/doi/abs/10.1080/01621459.1982.10477856>
- [8] Dawid, A. P. and Sebastiani, P. Coherent dispersion criteria for optimal experimental design. *Annals of Statistics*, pp. 65–81, 1999.
- [9] Deng, J., Dong, W., Socher, R., Li, L.-J., Li, K., and Fei-Fei, L. Imagenet: A large-scale hierarchical image database. In *2009 IEEE conference on computer vision and pattern recognition*, pp. 248–255. Ieee, 2009.
- [10] Fan, H., Ferianc, M., Que, Z., Niu, X., Rodrigues, M. L., and Luk, W. Accelerating bayesian neural networks via algorithmic and hardware optimizations. *IEEE Transactions on Parallel and Distributed Systems*, 2022.
- [11] Friedman, J. H. Multivariate adaptive regression splines. *The annals of statistics*, 19(1):1–67, 1991.
- [12] Gneiting, T. and Katzfuss, M. Probabilistic forecasting. *Annual Review of Statistics and Its Application*, 1: 125–151, 2014.
- [13] Gneiting, T. and Raftery, A. E. Strictly proper scoring rules, prediction, and estimation. *Journal of the American Statistical Association*, 102(477):359–378, 2007. doi: 10.1198/016214506000001437. URL <https://doi.org/10.1198/016214506000001437>
- [14] Guo, C., Pleiss, G., Sun, Y., and Weinberger, K. Q. On calibration of modern neural networks. In *International Conference on Machine Learning*, pp. 1321–1330. PMLR, 2017.
- [15] Gupta, A., Kvernadze, G., and Srikumar, V. Bert & family eat word salad: Experiments with text understanding. *ArXiv*, abs/2101.03453, 2021.
- [16] Gupta, K., Rahimi, A., Ajanthan, T., Mensink, T., Sminchisescu, C., and Hartley, R. Calibration of neural networks using splines. In *International Conference on Learning Representations*, 2020.
- [17] Haggemüller, S., Maron, R. C., Hekler, A., Utikal, J. S., Barata, C., Barnhill, R. L., Beltraminelli, H., Berking, C., Betz-Stablein, B., Blum, A., Braun, S. A., Carr, R., Combalia, M., Fernandez-Figueras, M.-T., Ferrara, G., Fraitag, S., French, L. E., Gellrich, F. F., Ghoreschi, K., Goebeler, M., Guitera, P., Haenssle, H. A., Haferkamp, S., Heinzerling, L., Heppt, M. V., Hilke, F. J., Hobelsberger, S., Krah, D., Kutzner, H., Lallas, A., Liopyris, K., Llamas-Velasco, M., Malvey, J., Meier, F., Müller, C. S., Navarini, A. A., Navarrete-Dechent, C., Perasole, A., Poch, G., Podlipnik, S., Requena, L., Rotemberg, V. M., Saggini, A., Sanguenza, O. P., Santonja, C., Schandendorf, D., Schilling, B., Schlaak, M., Schlager, J. G., Sergon, M., Sondermann, W., Soyer, H. P., Starz, H., Stolz, W., Vale, E., Weyers, W., Zink, A., Krieghoff-Henning, E., Kather, J. N., von Kalle, C., Lipka, D. B., Fröhling, S., Hauschild, A., Kittler, H., and Brinker, T. J. Skin cancer classification via convolutional neural networks: systematic review of studies involving human experts. *European Journal of Cancer*, 156:202–216, 2021. ISSN 0959-8049. doi: <https://doi.org/10.1016/j.ejca.2021.06.049>. URL <https://www.sciencedirect.com/science/article/pii/S0959804921004445>
- [18] Hastie, T. and Tibshirani, R. Classification by pairwise coupling. *The annals of statistics*, 26(2):451–471, 1998.

- [19] He, K., Zhang, X., Ren, S., and Sun, J. Delving deep into rectifiers: Surpassing human-level performance on imagenet classification. In *Proceedings of the IEEE international conference on computer vision*, pp. 1026–1034, 2015.
- [20] He, K., Zhang, X., Ren, S., and Sun, J. Deep residual learning for image recognition. In *Proceedings of the IEEE conference on computer vision and pattern recognition*, pp. 770–778, 2016.
- [21] Hoeffding, W. A Class of Statistics with Asymptotically Normal Distribution. *The Annals of Mathematical Statistics*, 19(3):293 – 325, 1948. doi: 10.1214/aoms/1177730196. URL <https://doi.org/10.1214/aoms/1177730196>
- [22] Huang, G., Liu, Z., Van Der Maaten, L., and Weinberger, K. Q. Densely connected convolutional networks. In *Proceedings of the IEEE conference on computer vision and pattern recognition*, pp. 4700–4708, 2017.
- [23] Islam, A., Chen, C.-F., Panda, R., Karlinsky, L., Radke, R. J., and Feris, R. S. A broad study on the transferability of visual representations with contrastive learning. *2021 IEEE/CVF International Conference on Computer Vision (ICCV)*, pp. 8825–8835, 2021.
- [24] Joo, T., Chung, U., and Seo, M. Being bayesian about categorical probability. In *ICML*, 2020.
- [25] Katsaouni, N., Tashkandi, A., Wiese, L., and Schulz, M. H. Machine learning based disease prediction from genotype data. *Biological Chemistry*, 402(8):871–885, 2021. doi: doi:10.1515/hsz-2021-0109. URL <https://doi.org/10.1515/hsz-2021-0109>.
- [26] Kristiadi, A., Hein, M., and Hennig, P. Being bayesian, even just a bit, fixes overconfidence in relu networks. In *ICML*, 2020.
- [27] Krizhevsky, A. et al. Learning multiple layers of features from tiny images. 2009.
- [28] Kull, M., Filho, T. S., and Flach, P. Beta calibration: a well-founded and easily implemented improvement on logistic calibration for binary classifiers. In Singh, A. and Zhu, J. (eds.), *Proceedings of the 20th International Conference on Artificial Intelligence and Statistics*, volume 54 of *Proceedings of Machine Learning Research*, pp. 623–631. PMLR, 20–22 Apr 2017. URL <https://proceedings.mlr.press/v54/kull17a.html>.
- [29] Kull, M., Perello Nieto, M., Kängsepp, M., Silva Filho, T., Song, H., and Flach, P. Beyond temperature scaling: Obtaining well-calibrated multi-class probabilities with dirichlet calibration. *Advances in Neural Information Processing Systems*, 32:12316–12326, 2019.
- [30] Kumar, A., Sarawagi, S., and Jain, U. Trainable calibration measures for neural networks from kernel mean embeddings. In Dy, J. and Krause, A. (eds.), *Proceedings of the 35th International Conference on Machine Learning*, volume 80 of *Proceedings of Machine Learning Research*, pp. 2805–2814. PMLR, 10–15 Jul 2018. URL <https://proceedings.mlr.press/v80/kumar18a.html>.
- [31] Kumar, A., Liang, P., and Ma, T. Verified uncertainty calibration. In *Proceedings of the 33rd International Conference on Neural Information Processing Systems*, pp. 3792–3803, 2019.
- [32] LeCun, Y., Bottou, L., Bengio, Y., and Haffner, P. Gradient-based learning applied to document recognition. *Proceedings of the IEEE*, 86(11):2278–2324, 1998.
- [33] Liu, C., Zoph, B., Neumann, M., Shlens, J., Hua, W., Li, L.-J., Fei-Fei, L., Yuille, A., Huang, J., and Murphy, K. Progressive neural architecture search. In *Proceedings of the European conference on computer vision (ECCV)*, pp. 19–34, 2018.
- [34] Maddox, W. J., Izmailov, P., Garipov, T., Vetrov, D. P., and Wilson, A. G. A simple baseline for bayesian uncertainty in deep learning. *Advances in Neural Information Processing Systems*, 32:13153–13164, 2019.
- [35] Menon, A. K., Rawat, A. S., Reddi, S. J., Kim, S., and Kumar, S. A statistical perspective on distillation. In *ICML*, 2021.
- [36] Minderer, M., Djolonga, J., Romijnders, R., Hubis, F., Zhai, X., Houlsby, N., Tran, D., and Lucic, M. Revisiting the calibration of modern neural networks. *Advances in Neural Information Processing Systems*, 34, 2021.
- [37] Morales-Álvarez, P., Hernández-Lobato, D., Molina, R., and Hernández-Lobato, J. M. Activation-level uncertainty in deep neural networks. In *ICLR*, 2021.

- [38] Murphy, A. H. A new vector partition of the probability score. *Journal of Applied Meteorology and Climatology*, 12(4):595 – 600, 1973. doi: 10.1175/1520-0450(1973)012<0595:ANVPOT>2.0.CO;2. URL [https://journals.ametsoc.org/view/journals/apme/12/4/1520-0450\\_1973\\_012\\_0595\\_anvpot\\_2\\_0\\_co\\_2.xml](https://journals.ametsoc.org/view/journals/apme/12/4/1520-0450_1973_012_0595_anvpot_2_0_co_2.xml).
- [39] Naeini, M. P., Cooper, G. F., and Hauskrecht, M. Obtaining well calibrated probabilities using bayesian binning. In *Proceedings of the Twenty-Ninth AAAI Conference on Artificial Intelligence*, AAAI’15, pp. 2901–2907. AAAI Press, 2015. ISBN 0262511290.
- [40] Nguyen, K. and O’Connor, B. Posterior calibration and exploratory analysis for natural language processing models. In *Proceedings of the 2015 Conference on Empirical Methods in Natural Language Processing*, pp. 1587–1598, 2015.
- [41] Nixon, J., Dusenberry, M. W., Zhang, L., Jerfel, G., and Tran, D. Measuring calibration in deep learning. In *CVPR Workshops*, volume 2, 2019.
- [42] Platt, J. C. Probabilistic outputs for support vector machines and comparisons to regularized likelihood methods. In *Advances in Large-Margin Classifiers*, pp. 61–74. MIT Press, 1999.
- [43] Popordanoska, T., Sayer, R., and Blaschko, M. B. A consistent and differentiable lp canonical calibration error estimator. In Oh, A. H., Agarwal, A., Belgrave, D., and Cho, K. (eds.), *Advances in Neural Information Processing Systems*, 2022. URL <https://openreview.net/forum?id=HMs5pxZq1If>
- [44] Rafiei, M. H. and Adeli, H. A novel machine learning model for estimation of sale prices of real estate units. *Journal of Construction Engineering and Management*, 142(2):04015066, 2016.
- [45] Rahimi, A., Shaban, A., Cheng, C.-A., Hartley, R., and Boots, B. Intra order-preserving functions for calibration of multi-class neural networks. *Advances in Neural Information Processing Systems*, 33: 13456–13467, 2020.
- [46] Roelofs, R., Cain, N., Shlens, J., and Mozer, M. C. Mitigating bias in calibration error estimation, 2021.
- [47] Schrittwieser, J., Antonoglou, I., Hubert, T., Simonyan, K., Sifre, L., Schmitt, S., Guez, A., Lockhart, E., Hassabis, D., Graepel, T., et al. Mastering atari, go, chess and shogi by planning with a learned model. *Nature*, 588(7839):604–609, 2020.
- [48] Song, H., Diethe, T., Kull, M., and Flach, P. Distribution calibration for regression. In *International Conference on Machine Learning*, pp. 5897–5906. PMLR, 2019.
- [49] Takeshi, A. *Advanced econometrics*. Harvard university press, 1985.
- [50] Tian, J., Yung, D., Hsu, Y.-C., and Kira, Z. A geometric perspective towards neural calibration via sensitivity decomposition. In *NeurIPS*, 2021.
- [51] Tomani, C., Gruber, S., Erdem, M. E., Cremers, D., and Buettner, F. Post-hoc uncertainty calibration for domain drift scenarios. In *Proceedings of the IEEE/CVF Conference on Computer Vision and Pattern Recognition (CVPR)*, pp. 10124–10132, June 2021.
- [52] Tsagris, M., Beneki, C., and Hassani, H. On the folded normal distribution. *Mathematics*, 2(1):12–28, feb 2014. doi: 10.3390/math2010012. URL <https://doi.org/10.3390/math2010012>.
- [53] Vaicenavicius, J., Widmann, D., Andersson, C., Lindsten, F., Roll, J., and Schön, T. Evaluating model calibration in classification. In *The 22nd International Conference on Artificial Intelligence and Statistics*, pp. 3459–3467. PMLR, 2019.
- [54] Wang, X., Liu, H., Shi, C., and Yang, C. Be confident! towards trustworthy graph neural networks via confidence calibration. In *NeurIPS*, 2021.
- [55] Wehenkel, A. and Louppe, G. Unconstrained monotonic neural networks. *Advances in Neural Information Processing Systems*, 32:1545–1555, 2019.
- [56] Wenger, J., Kjellström, H., and Triebel, R. Non-parametric calibration for classification. In *International Conference on Artificial Intelligence and Statistics*, pp. 178–190. PMLR, 2020.
- [57] Widmann, D., Lindsten, F., and Zachariah, D. Calibration tests in multi-class classification: A unifying framework. *Advances in Neural Information Processing Systems*, 32:12257–12267, 2019.
- [58] Widmann, D., Lindsten, F., and Zachariah, D. Calibration tests beyond classification. In *International Conference on Learning Representations*, 2021. URL <https://openreview.net/forum?id=-bxf89v3Nx>.

- [59] Yen, M.-H., Liu, D.-W., Hsin, Y.-C., Lin, C.-E., and Chen, C.-C. Application of the deep learning for the prediction of rainfall in southern taiwan. *Scientific reports*, 9(1):1–9, 2019.
- [60] Zadrozny, B. and Elkan, C. Obtaining calibrated probability estimates from decision trees and naive bayesian classifiers. *ICML*, 1, 05 2001.
- [61] Zadrozny, B. and Elkan, C. Transforming classifier scores into accurate multiclass probability estimates. In *Proceedings of the Eighth ACM SIGKDD International Conference on Knowledge Discovery and Data Mining*, KDD '02, pp. 694–699, New York, NY, USA, 2002. Association for Computing Machinery. ISBN 158113567X. doi: 10.1145/775047.775151. URL <https://doi.org/10.1145/775047.775151>.
- [62] Zagoruyko, S. and Komodakis, N. Wide residual networks. In *British Machine Vision Conference 2016*. British Machine Vision Association, 2016.
- [63] Zhang, J., Kailkhura, B., and Han, T. Y.-J. Mix-n-match: Ensemble and compositional methods for uncertainty calibration in deep learning. In *International Conference on Machine Learning*, pp. 11117–11128. PMLR, 2020.

## Checklist

1. For all authors...
  - (a) Do the main claims made in the abstract and introduction accurately reflect the paper’s contributions and scope? [Yes]
  - (b) Did you describe the limitations of your work? [Yes] We mention required conditions for the proofs either directly or refer to Appendix D
  - (c) Did you discuss any potential negative societal impacts of your work? [No] We see positive societal impacts from improved uncertainty awareness via recalibration.
  - (d) Have you read the ethics review guidelines and ensured that your paper conforms to them? [Yes]
2. If you are including theoretical results...
  - (a) Did you state the full set of assumptions of all theoretical results? [Yes] Major conditions are directly stated; minor conditions in Appendix D as referred.
  - (b) Did you include complete proofs of all theoretical results? [Yes] In Appendix D
3. If you ran experiments...
  - (a) Did you include the code, data, and instructions needed to reproduce the main experimental results (either in the supplemental material or as a URL)? [Yes] Full code is located in the supplementary material and further experimental details are in Appendix G
  - (b) Did you specify all the training details (e.g., data splits, hyperparameters, how they were chosen)? [Yes] Relevant training details are located in Appendix G. A lot of models are not trained by ourselves. Instead, we loaded their results from publicly accessible URLs. We refer to each URL and the original work, where the training was conducted.
  - (c) Did you report error bars (e.g., with respect to the random seed after running experiments multiple times)? [Yes] We repeated experiments until the error bars are barely visible or not visible anymore. Only exception is Figure 4, where aggregations hinder visibility due to high variances in training different seeds.
  - (d) Did you include the total amount of compute and the type of resources used (e.g., type of GPUs, internal cluster, or cloud provider)? [Yes] See Appendix G
4. If you are using existing assets (e.g., code, data, models) or curating/releasing new assets...
  - (a) If your work uses existing assets, did you cite the creators? [Yes] We used assets from [29] and Rahimi et al. [45] located in [https://github.com/markus93/NN\\_calibration/](https://github.com/markus93/NN_calibration/) and <https://github.com/AmirooR/IntraOrderPreservingCalibration>.
  - (b) Did you mention the license of the assets? [No] Each lincense can be viewed in the respective github repository.

- (c) Did you include any new assets either in the supplemental material or as a URL? [\[Yes\]](#)  
We include the code for reproducing the experiments and figures in the supplementary material.
  - (d) Did you discuss whether and how consent was obtained from people whose data you're using/curating? [\[No\]](#) The data is publicly accessible and we cited each respective source.
  - (e) Did you discuss whether the data you are using/curating contains personally identifiable information or offensive content? [\[No\]](#) The data is often abstract in nature (we used pretrained logits provided by a publicly accessible source) or downloaded the dataset from the UCI dataset database.
5. If you used crowdsourcing or conducted research with human subjects...
- (a) Did you include the full text of instructions given to participants and screenshots, if applicable? [\[N/A\]](#) No crowdsourcing or human subjects
  - (b) Did you describe any potential participant risks, with links to Institutional Review Board (IRB) approvals, if applicable? [\[N/A\]](#) No crowdsourcing or human subjects
  - (c) Did you include the estimated hourly wage paid to participants and the total amount spent on participant compensation? [\[N/A\]](#) No crowdsourcing or human subjects
